# Supplementary material for: Thermal stress restructures volatile gas emissions from the model cnidarian Aiptasia
Source: Research Square preprint supplement (doi:10.21203/rs.3.rs-7991501/v1), 2025-11-24
Supplement: Supplementary file 1 [file 4d1d6e109406558470fadc2d.docx]

**Thermal stress restructures volatile gas emission from the model cnidarian Aiptasia**

Saturating irradiance was determined by analyzing oxygen metabolism at seven different irradiances in symbiotic anemones. Package respR (Harianto et al., 2019) was used to determine rate of oxygen consumption at each irradiance, which was then used to calculate saturating irradiance for symbiotic anemones.

**Table S1:** Oxygen evolution at seven irradiance intensities to determine saturating irradiance for symbiotic anemones

| **Sample** | **0 µmol photons**  **(mg O2 h-1)** | **20 µmol photons**  **(mg O2 h-1)** | **50 µmol photons**  **(mg O2 h-1)** | **100 µmol photons**  **(mg O2 h-1)** | **250 µmol photons**  **(mg O2 h-1)** | **400 µmol photons**  **(mg O2 h-1)** | **1000 µmol photons**  **(mg O2 h-1)** | **Saturating Irradiance (Ek; µmol photons)** |
| --- | --- | --- | --- | --- | --- | --- | --- | --- |
| **Biorep 1** | -0.0358 | 0.0207 | 0.0457 | 0.0650 | 0.0630 | 0.0511 | 0.0372 | 173.423 |
| **Biorep 2** | -0.0725 | 0.0243 | 0.0997 | 0.1406 | 0.0981 | 0.0310 | 0.0469 | 108.744 |
| **Biorep 3** | -0.1104 | 0.0532 | 0.1273 | 0.1674 | 0.0851 | 0.0311 | 0.0356 | 87.829 |
| **Biorep 4** | -0.0468 | 0.0116 | 0.0450 | 0.1008 | 0.0991 | 0.0511 | 0.0372 | 156.998 |


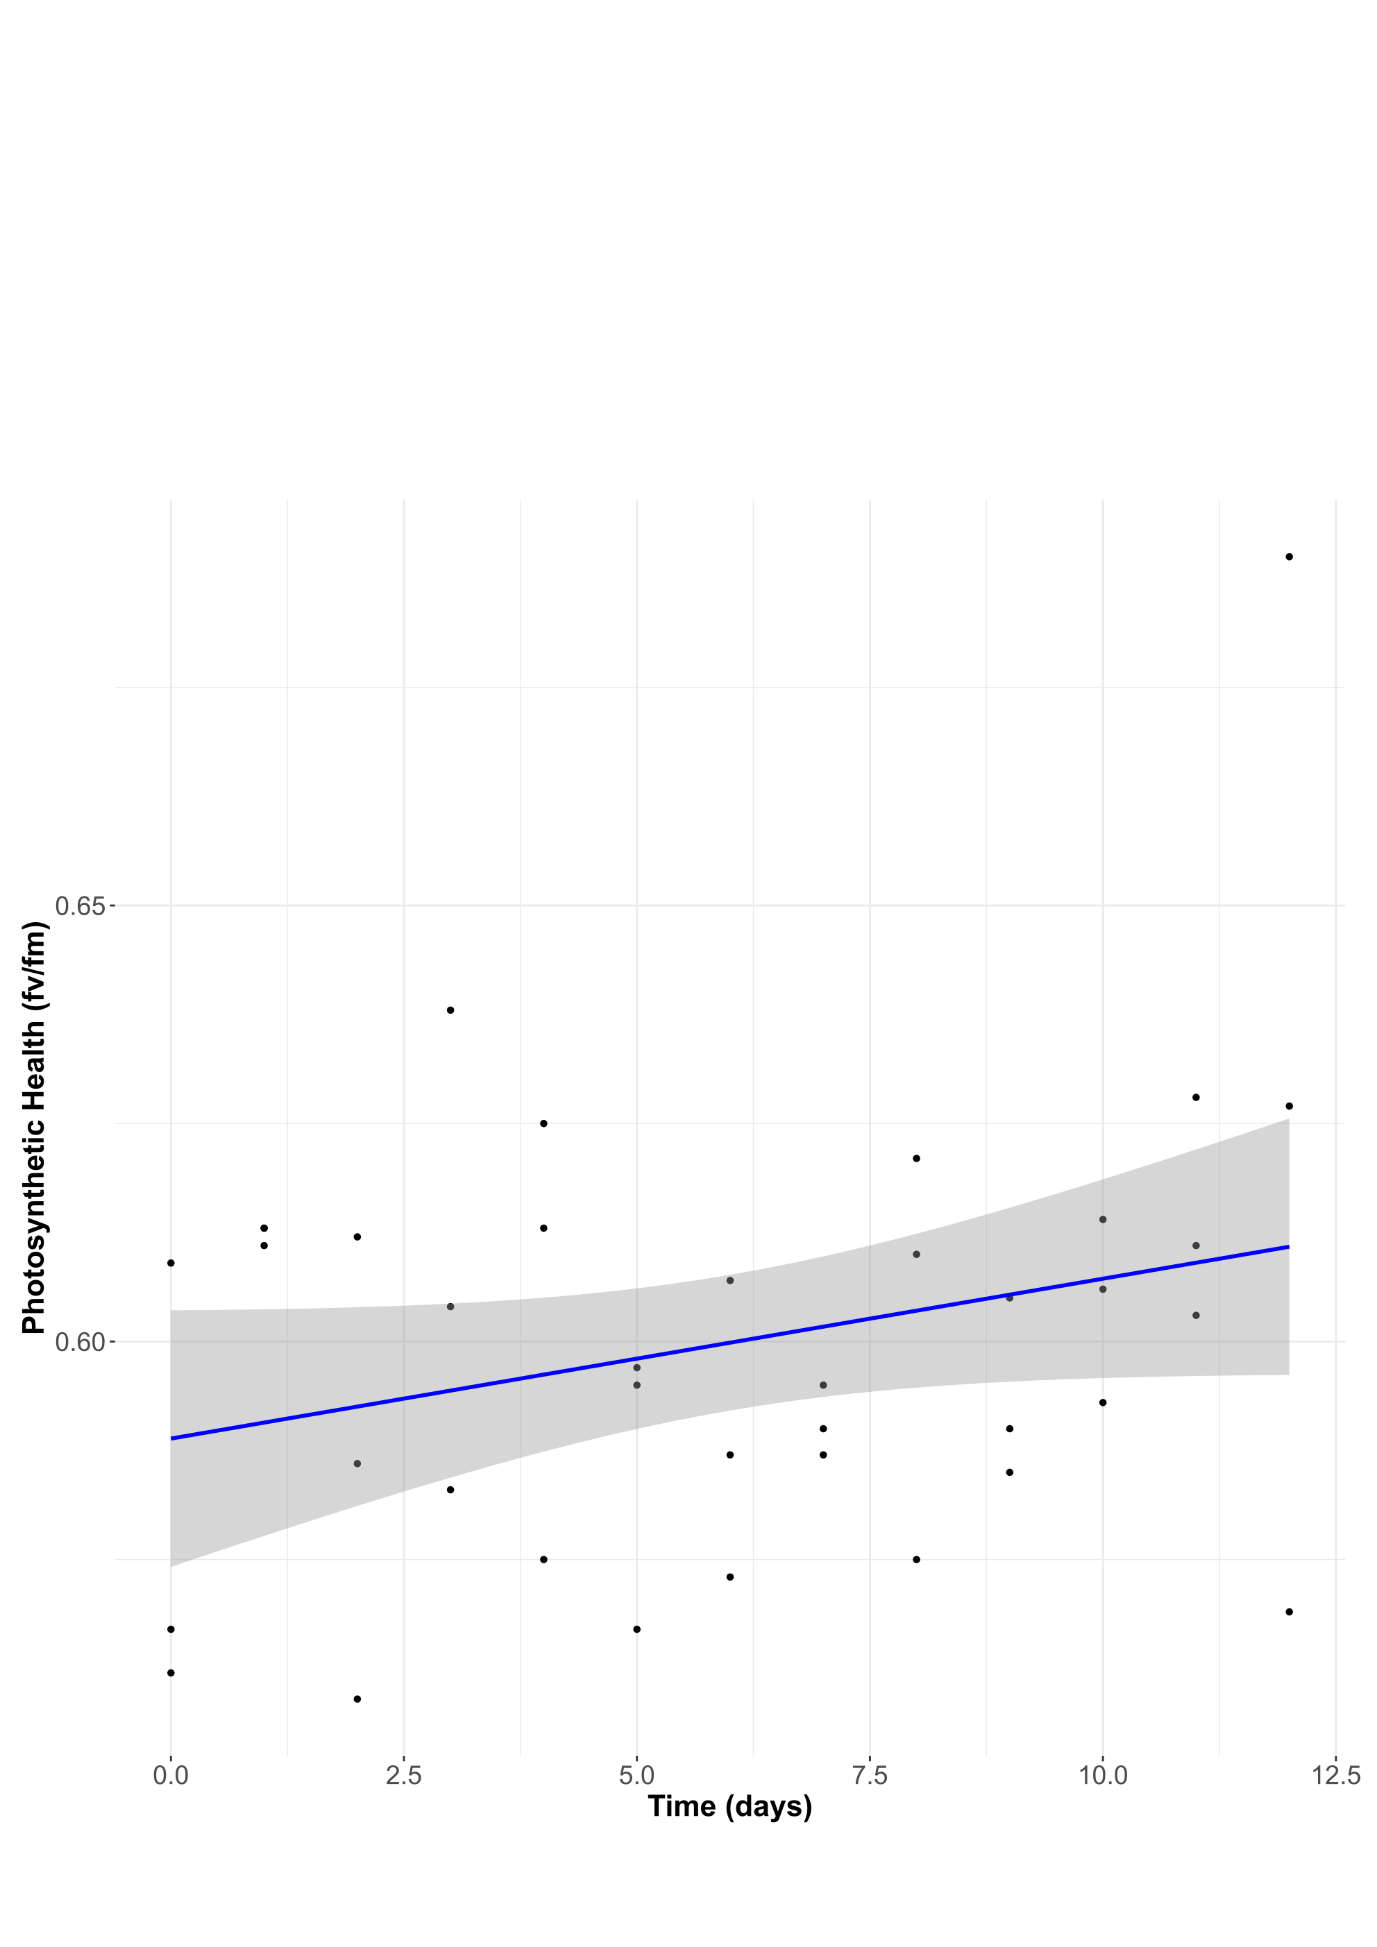


**Figure S1:** Linear regression showing photosynthetic health of symbiotic anemones over experimental treatment at 25 °C with 95% confidence interval.


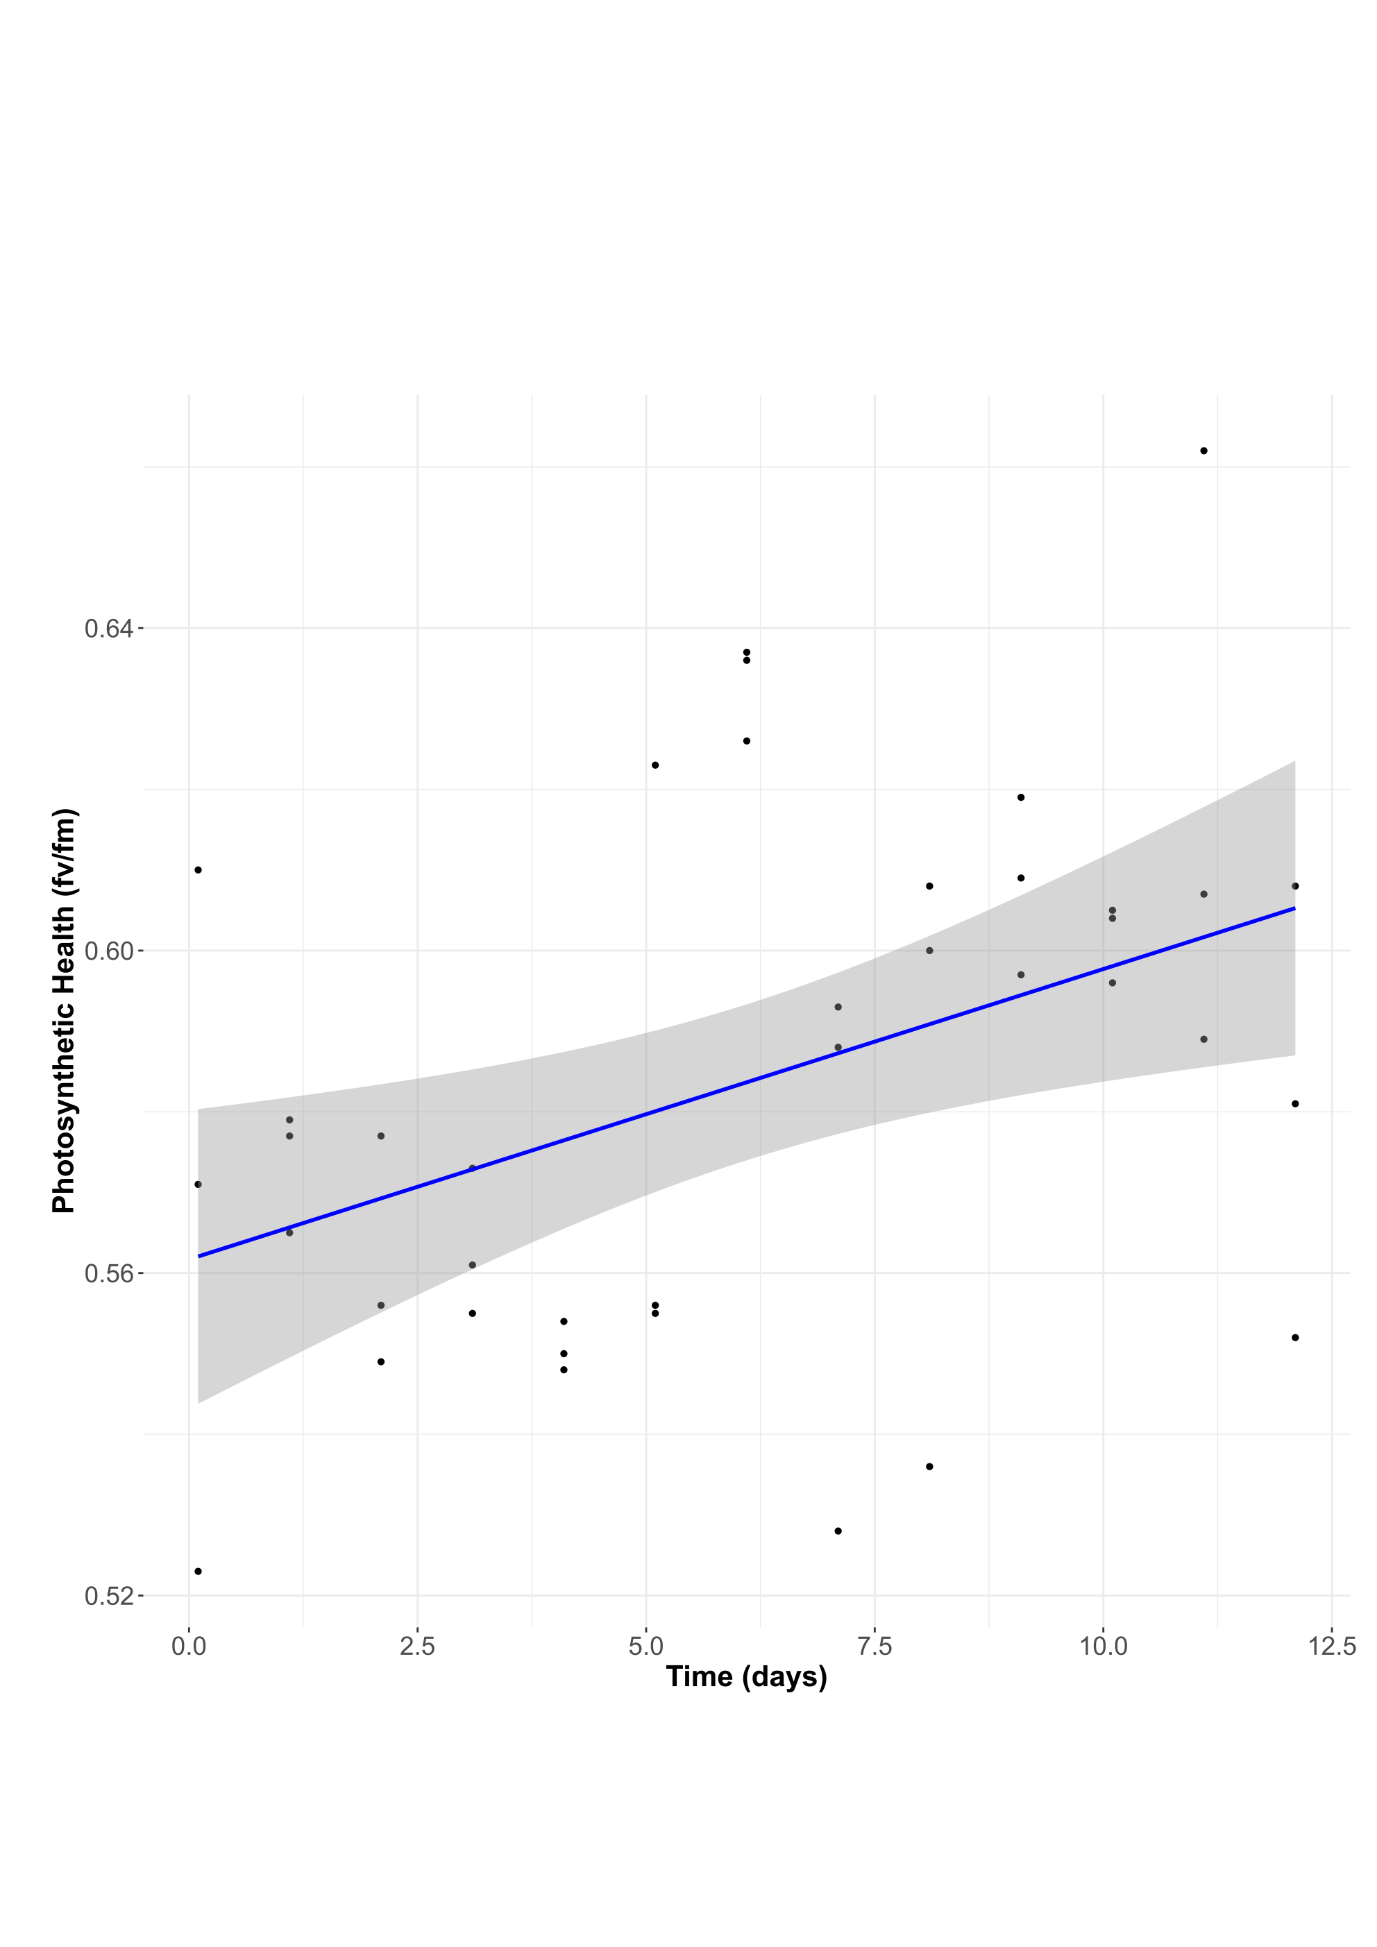


**Figure S2:** Linear regression showing photosynthetic health of symbiotic anemones over experimental treatment at 30 °C with 95% confidence interval.


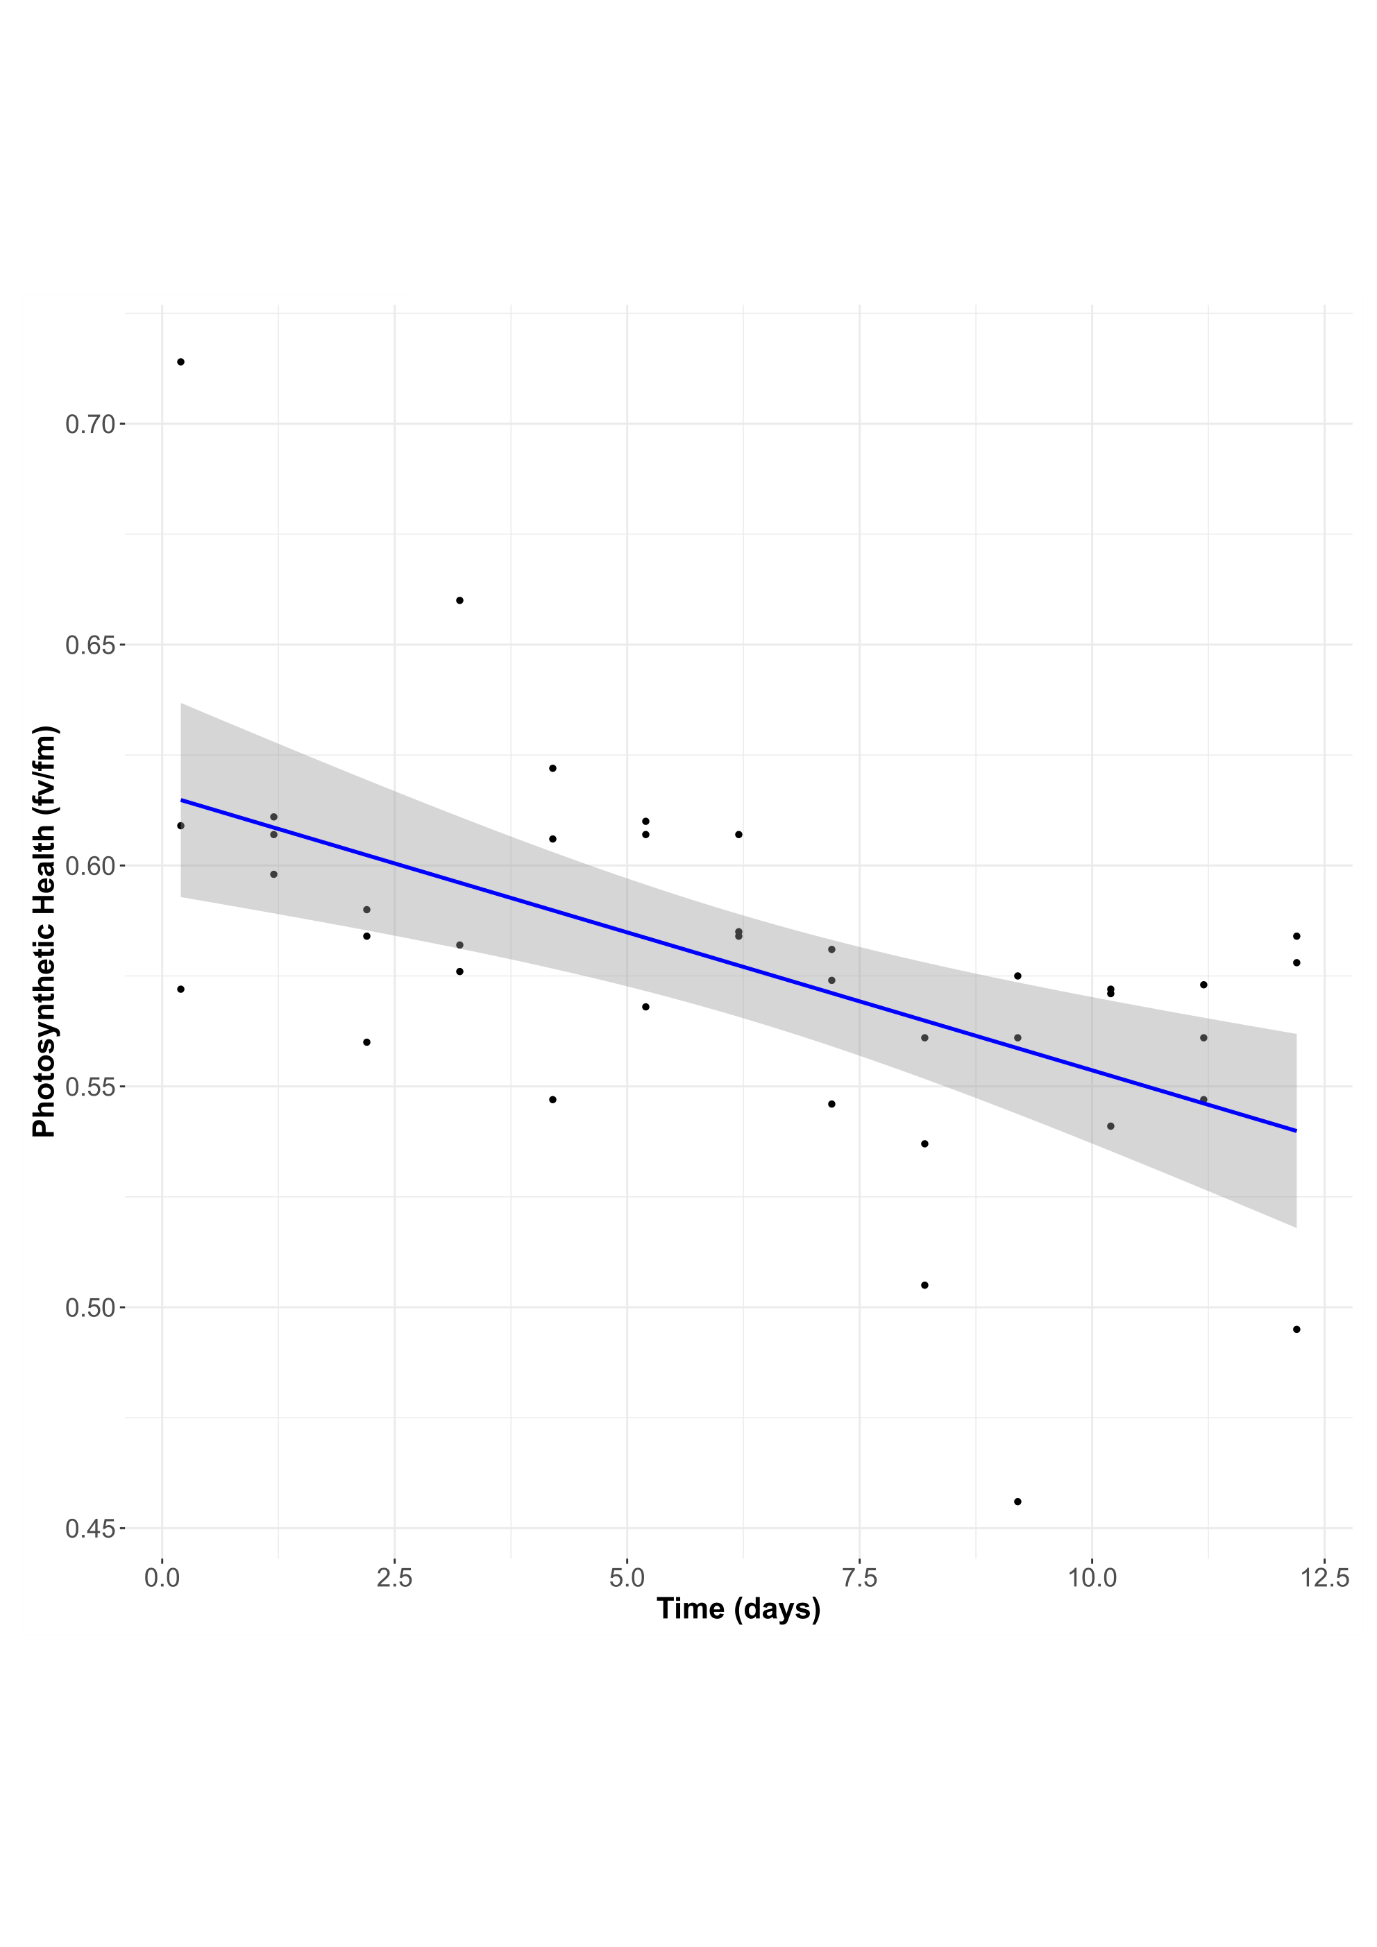


**Figure S3:** Linear regression showing photosynthetic health of symbiotic anemones over experimental treatment at 33.5 °C with 95% confidence interval.

**Table S2:** Differentially abundant BVOCs (p < 0.05) detected across aposymbiotic anemones at 1) 25 °C (control); 2) 30°C (mid) and 3) 33.5 °C (high)

| **BVOC** | **logFC** | **AveExpr** | **P.Value** | **adj.P.Val** | **label** | **Higher in** |
| --- | --- | --- | --- | --- | --- | --- |
| **2,7,10-trimethyldodecane** | 10.69152 | 7.526642 | 4.78E-05 | 0.006171 | control vs heat | heat |
| **2-Phenyl-3-methyl-pyrrolo(2,3-b)pyrazine** | 15.81566 | 10.73306 | 3.14E-08 | 4.05E-06 | mid vs heat | mid |
| **Napthalene** | 9.450171 | 8.982321 | 0.000808 | 0.029965 | mid vs heat | mid |
| **6-Methyl-triazolo(2,3-b)(1,2,4)-triazine** | 9.169106 | 8.50222 | 0.000929 | 0.029965 | mid vs heat | mid |
| **Di-tert-butyl peroxide** | 9.004638 | 8.819416 | 0.001191 | 0.029965 | mid vs heat | mid |
| **1,2-Dichloroethane** | 8.969308 | 8.547841 | 0.001398 | 0.029965 | mid vs heat | mid |
| **Acetone** | 9.284798 | 10.1941 | 0.001613 | 0.029965 | mid vs heat | mid |
| **Dibromomethane** | 8.744609 | 8.667974 | 0.001626 | 0.029965 | mid vs heat | mid |
| **2,7,10-trimethyldodecane** | -8.27221 | 7.526642 | 0.002938 | 0.037705 | mid vs heat | heat |
| **1,2,3-Trimethylindene** | 8.176538 | 6.933994 | 0.002946 | 0.037705 | mid vs heat | mid |
| **1,2,4-Trimethylbenzene** | 8.332963 | 8.879407 | 0.003211 | 0.037705 | mid vs heat | mid |
| **2-Butanone** | 8.249844 | 8.229035 | 0.003215 | 0.037705 | mid vs heat | mid |
| **2-Amino-5,7-dimethyl-[1,2,4]triazolo[1,5-a]pyrimidine** | 8.116112 | 8.033807 | 0.004291 | 0.045742 | mid vs heat | mid |
| **Hexadecane** | -7.04345 | 6.547053 | 0.00461 | 0.045742 | mid vs heat | heat |
| **2-Propenylbenzene** | 7.643879 | 7.977675 | 0.005344 | 0.049244 | mid vs heat | mid |

**Table S3:** Differentially abundant BVOCs (<0.05) detected across symbiotic anemones at 1) 25 °C (control); 2) 30°C (mid) and 3) 33.5 °C (high)

| **BVOC** | **logFC** | **AveExpr** | **P.Value** | **adj.P.Val** | **label** | **Higher in** |
| --- | --- | --- | --- | --- | --- | --- |
| **Dimethyl sulphide** | 9.974351 | 14.976 | 5.17E-06 | 0.000517 | control vs heat | heat |
| **1-(2-Pyridyl)piperazine** | 8.197696 | 7.415443 | 0.000153 | 0.007628 | control vs heat | heat |
| **1-Iodododecane** | 7.03342 | 12.80556 | 0.001114 | 0.037141 | control vs heat | heat |
| **1-(2-Pyridyl)piperazine** | -8.37793 | 7.415443 | 0.000248 | 0.017247 | mid vs heat | heat |
| **2,7,10-trimethyldodecane** | -8.72061 | 6.225604 | 0.000378 | 0.017247 | mid vs heat | heat |
| **Di-tert-butyl peroxide** | 7.938375 | 7.262856 | 0.000574 | 0.017247 | mid vs heat | mid |
| **Dimethyl sulphide** | -5.703 | 14.976 | 0.00069 | 0.017247 | mid vs heat | heat |
| **Eucalyptol** | -8.16591 | 5.929439 | 0.001045 | 0.020892 | mid vs heat | heat |
| **Methyl N-hydroxybenzenecarboximidoate** | -7.90354 | 7.151814 | 0.001706 | 0.02844 | mid vs heat | heat |

**Table S3:** BVOCs detected throughout aposymbiotic dataset. All BVOCs (peak normalised to protein content) and their chemical classes that were detected in aposymbiotic anemones at three different temperature treatments (control: 25 °C, sub-bleaching: 30 °C and bleaching: 33.5 °C). BVOCs had to be detected in at least three replicates in at least one temperature treatment to be included. Chemical class was determined based on the molecule’s functional group(s). Significance was determined using differential abundance testing and the number of asterisks denotes the size of the adjusted p-value: *<0.05, **<0.01, ***<0.001.

| **BVOC** | **Control Aposymbiotic** | | | | | | **Mid Aposymbiotic** | | | | | **Heat Aposymbiotic** | | | | | | **Functional group** | **Significance** |
| --- | --- | --- | --- | --- | --- | --- | --- | --- | --- | --- | --- | --- | --- | --- | --- | --- | --- | --- | --- |
| **(1-Methylethyl)-benzene** | 2.E+03 | 9.E+02 | 2.E+03 | 0 | 0 | 0 | 3.E+03 | 1.E+03 | 0 | 0 | 3.E+01 | 5.E+02 | 3.E+01 | 0 | 2.E+01 | 0 | 0 | Aromatic compound |  |
| **(E)-1-Propenylaziridine** | 0 | 3.E+02 | 4.E+02 | 0 | 0 | 8.E+02 | 0 | 0 | 2.E+02 | 0 | 0 | 0 | 0 | 0 | 6.E+01 | 0 | 3.E+02 | Nitrogen containing compound |  |
| **1-(2-Pyridyl)piperazine** | 0 | 0 | 0 | 0 | 0 | 3.E+02 | 0 | 4.E+02 | 1.E+03 | 0 | 0 | 7.E+01 | 1.E+02 | 0 | 1.E+03 | 0 | 2.E+02 | Nitrogen containing compound |  |
| **1,1,2,2,3,3-Hexamethylindane** | 0 | 2.E+02 | 2.E+02 | 0 | 0 | 8.E+00 | 2.E+02 | 0 | 0 | 0 | 0 | 0 | 0 | 0 | 4.E+01 | 0 | 0 | Aromatic compound |  |
| **1,1-dimethyl ester butanoic acid** | 0 | 0 | 0 | 0 | 9.E+01 | 0 | 1.E+03 | 9.E+02 | 0 | 0 | 0 | 2.E+02 | 1.E+02 | 0 | 4.E+02 | 0 | 0 | Ester |  |
| **1,2,3-Trimethylbenzene** | 5.E+03 | 6.E+03 | 4.E+03 | 0 | 0 | 0 | 4.E+03 | 2.E+04 | 2.E+03 | 0 | 0 | 0 | 0 | 0 | 0 | 0 | 0 | Aromatic compound |  |
| **1,2,3-Trimethylindene** | 0 | 3.E+02 | 0 | 0 | 1.E+01 | 0 | 7.E+02 | 8.E+02 | 2.E+02 | 8.E+01 | 2.E+02 | 0 | 0 | 0 | 0 | 0 | 0 | Aromatic compound | * |
| **1,2,4-Trimethylbenzene** | 2.E+04 | 2.E+04 | 2.E+04 | 0 | 0 | 0 | 2.E+04 | 7.E+04 | 1.E+04 | 0 | 0 | 0 | 0 | 0 | 0 | 0 | 0 | Aromatic compound | * |
| **1,2-Dichloroethane** | 2.E+03 | 3.E+03 | 5.E+03 | 0 | 0 | 0 | 5.E+03 | 2.E+04 | 7.E+02 | 0 | 5.E+02 | 0 | 0 | 0 | 0 | 0 | 0 | Halogenated hydrocarbon | * |
| **1,2-Dimethylhydrindene** | 1.E+02 | 2.E+02 | 1.E+02 | 0 | 0 | 0 | 2.E+02 | 4.E+02 | 0 | 0 | 0 | 0 | 0 | 0 | 0 | 0 | 0 | Aromatic compound |  |
| **Ethylbenzene** | 1.E+03 | 1.E+03 | 1.E+03 | 0 | 3.E+02 | 0 | 7.E+02 | 7.E+02 | 0 | 0 | 0 | 0 | 0 | 0 | 0 | 0 | 0 | Aromatic compound |  |
| **1,3-Dimethylbenzene** | 3.E+03 | 3.E+03 | 3.E+03 | 0 | 0 | 0 | 4.E+03 | 5.E+03 | 0 | 0 | 0 | 0 | 0 | 0 | 0 | 0 | 0 | Aromatic compound |  |
| **1,4-Dioxaspiro[4,5]decane** | 2.E+03 | 3.E+03 | 3.E+03 | 0 | 0 | 0 | 5.E+03 | 7.E+03 | 9.E+01 | 0 | 0 | 0 | 0 | 0 | 0 | 0 | 0 | Ether |  |
| **1,6,7-Trimethylnapthalene** | 6.E+02 | 6.E+02 | 2.E+02 | 7.E+00 | 0 | 2.E+02 | 0 | 0 | 0 | 0 | 0 | 0 | 0 | 0 | 1.E+02 | 0 | 3.E+02 | Aromatic compound |  |
| **1-Acetyl-4-(4-propylcyclohexyl)-benzene** | 0 | 2.E+02 | 1.E+02 | 6.E+01 | 0 | 0 | 0 | 0 | 0 | 0 | 0 | 0 | 0 | 0 | 0 | 0 | 0 | Ketone |  |
| **1-Ethyl-2,4-dimethylbenzene** | 1.E+03 | 9.E+02 | 1.E+02 | 0 | 0 | 0 | 3.E+02 | 3.E+03 | 0 | 0 | 0 | 0 | 0 | 0 | 0 | 0 | 0 | Aromatic compound |  |
| **1-Ethyl-2-methylbenzene** | 2.E+03 | 2.E+03 | 1.E+03 | 0 | 0 | 0 | 1.E+03 | 4.E+03 | 2.E+02 | 0 | 0 | 0 | 0 | 0 | 0 | 0 | 0 | Aromatic compound |  |
| **1-ethyl-4-methylbenzene** | 4.E+03 | 3.E+03 | 3.E+03 | 0 | 0 | 0 | 3.E+03 | 1.E+04 | 3.E+02 | 0 | 0 | 0 | 0 | 0 | 0 | 0 | 0 | Aromatic compound |  |
| **1H-Indane, 2,3-dihydro-4,7-dimethyl-** | 3.E+02 | 1.E+02 | 3.E+01 | 0 | 0 | 0 | 2.E+02 | 5.E+02 | 0 | 0 | 0 | 0 | 0 | 0 | 0 | 0 | 0 | Aromatic compound |  |
| **1H-Indene, 2,3-dihydro-1,1,3-trimethyl-** | 0 | 4.E+02 | 0 | 0 | 0 | 0 | 4.E+02 | 3.E+02 | 0 | 0 | 2.E+02 | 0 | 0 | 0 | 0 | 0 | 0 | Aromatic compound |  |
| **1H-Indene, 2,3-dihydro-4,7-dimethyl-** | 0 | 5.E+01 | 3.E+01 | 0 | 0 | 0 | 2.E+02 | 1.E+02 | 2.E+01 | 0 | 1.E+01 | 1.E+01 | 0 | 0 | 0 | 0 | 0 | Aromatic compound |  |
| **1H-Indole-5-carbonitrile** | 1.E+04 | 4.E+03 | 4.E+03 | 0 | 0 | 0 | 0 | 0 | 0 | 0 | 0 | 0 | 0 | 0 | 0 | 0 | 0 | Nitrogen containing compound |  |
| **1-Iodododecane** | 2.E+04 | 6.E+04 | 0 | 0 | 0 | 0 | 5.E+04 | 2.E+04 | 0 | 0 | 2.E+04 | 6.E+03 | 1.E+04 | 1.E+04 | 0 | 2.E+03 | 0 | Halogenated hydrocarbon |  |
| **1-Isopropyl-3,4-dimethyl-2-pyrazoline** | 4.E+02 | 3.E+02 | 3.E+02 | 0 | 0 | 0 | 1.E+03 | 3.E+03 | 0 | 0 | 0 | 0 | 0 | 0 | 0 | 0 | 0 | Nitrogen containing compound |  |
| **1-Methoxy-2,3-dimethylaziridine** | 2.E+02 | 3.E+02 | 5.E+02 | 0 | 0 | 0 | 7.E+01 | 4.E+01 | 0 | 0 | 0 | 0 | 0 | 0 | 1.E+02 | 0 | 0 | DFG |  |
| **1-Methyl-1H-2,3-benzodiazepine** | 0 | 0 | 0 | 0 | 0 | 0 | 4.E+02 | 0 | 0 | 0 | 5.E+01 | 3.E+01 | 7.E+01 | 0 | 7.E+01 | 0 | 0 | Nitrogen containing compound |  |
| **1-Methyl-1H-pyrrole** | 0 | 4.E+02 | 6.E+02 | 0 | 5.E+02 | 0 | 1.E+03 | 1.E+03 | 0 | 0 | 4.E+02 | 0 | 0 | 0 | 1.E+03 | 0 | 0 | Nitrogen containing compound |  |
| **1-Methyl-2-propylbenzene** | 1.E+03 | 6.E+02 | 1.E+02 | 0 | 0 | 0 | 0 | 1.E+03 | 0 | 0 | 0 | 0 | 0 | 0 | 4.E+02 | 0 | 0 | Aromatic compound |  |
| **1-Methylethyl ester dodenanoic acid** | 4.E+02 | 7.E+01 | 0 | 0 | 0 | 3.E+02 | 0 | 0 | 0 | 0 | 0 | 0 | 0 | 0 | 0 | 0 | 3.E+02 | Ester |  |
| **1-Nitro-4-(phenylmethoxy)-benzene** | 1.E+03 | 0 | 7.E+02 | 0 | 2.E+02 | 0 | 0 | 0 | 0 | 0 | 0 | 0 | 0 | 0 | 0 | 0 | 9.E+01 | DFG |  |
| **1-Phenyl-1,2-propanediol** | 4.E+02 | 2.E+02 | 0 | 0 | 9.E+01 | 0 | 0 | 0 | 0 | 0 | 0 | 0 | 0 | 0 | 2.E+02 | 0 | 0 | Alcohol |  |
| **2(3H)-Benzoxazolone** | 2.E+02 | 3.E+02 | 2.E+02 | 0 | 0 | 0 | 2.E+02 | 5.E+02 | 7.E+01 | 0 | 0 | 0 | 0 | 0 | 0 | 0 | 0 | DFG |  |
| **2,2,4-Trimethyl-1,3-pentanediol diisobutyrate** | 9.E+02 | 6.E+02 | 1.E+03 | 0 | 0 | 2.E+02 | 4.E+02 | 0 | 0 | 0 | 0 | 0 | 0 | 0 | 0 | 0 | 0 | Ester |  |

**Table S3** (cont.):

| **2,2-Dibromo-1-methyl-cyclopropanecarboxylic acid hydrazide** | 0 | 0 | 3.E+01 | 0 | 0 | 0 | 3.E+01 | 3.E+01 | 3.E+00 | 0 | 0 | 0 | 0 | 0 | 0 | 0 | 0 | DFG |  |
| --- | --- | --- | --- | --- | --- | --- | --- | --- | --- | --- | --- | --- | --- | --- | --- | --- | --- | --- | --- |
| **2,3-Dihydro-5-methyl-1H-indene** | 7.E+02 | 7.E+02 | 6.E+02 | 0 | 0 | 0 | 4.E+02 | 2.E+03 | 0 | 0 | 0 | 0 | 0 | 0 | 0 | 0 | 0 | Aromatic compound |  |
| **2,4-Dimethylstyrene** | 1.E+03 | 1.E+03 | 6.E+02 | 0 | 0 | 0 | 9.E+02 | 3.E+03 | 3.E+02 | 0 | 0 | 0 | 0 | 0 | 0 | 0 | 0 | Aromatic compound |  |
| **2,7,10-trimethyldodecane** | 0 | 0 | 0 | 0 | 0 | 0 | 3.E+03 | 0 | 0 | 0 | 0 | 1.E+03 | 2.E+03 | 2.E+03 | 0 | 1.E+04 | 9.E+01 | Alkane | *** |
| **2,7-Dimethylnapthalene** | 1.E+04 | 1.E+03 | 2.E+03 | 0 | 0 | 0 | 0 | 0 | 0 | 0 | 0 | 2.E+01 | 0 | 0 | 0 | 0 | 0 | Aromatic compound |  |
| **2-[(1-(4-Methylphenyl)ethylidene)amino]benzonitrile** | 0 | 2.E+02 | 1.E+02 | 0 | 0 | 3.E+02 | 0 | 0 | 0 | 0 | 0 | 0 | 0 | 0 | 5.E+01 | 0 | 7.E+02 | Nitrogen containing compound |  |
| **2-[4-(1,1-dimethylpropyl)phenoxy]-ethanol** | 0 | 0 | 2.E+02 | 0 | 0 | 2.E+01 | 1.E+02 | 3.E+02 | 2.E+02 | 0 | 0 | 0 | 0 | 0 | 0 | 0 | 5.E+02 | DFG |  |
| **2-Acetyl-5-methylthiophene** | 8.E+02 | 7.E+02 | 7.E+02 | 0 | 0 | 0 | 1.E+02 | 0 | 0 | 0 | 1.E+00 | 0 | 0 | 0 | 6.E+00 | 0 | 0 | DFG |  |
| **2-Amino-5,7-dimethyl-[1,2,4]triazolo[1,5-a]pyrimidine** | 0 | 4.E+02 | 0 | 0 | 0 | 2.E+02 | 1.E+03 | 2.E+03 | 6.E+02 | 4.E+02 | 4.E+02 | 0 | 0 | 0 | 0 | 0 | 8.E+01 | Nitrogen containing compound | * |
| **2-Butanone** | 3.E+03 | 3.E+03 | 0 | 0 | 1.E+03 | 0 | 0 | 3.E+03 | 1.E+03 | 8.E+02 | 1.E+03 | 0 | 0 | 0 | 0 | 0 | 0 | Ketone | * |
| **2-Chloro-2,2-difluoro-1-phenylethanone** | 1.E+03 | 7.E+02 | 0 | 0 | 0 | 6.E+02 | 4.E+02 | 3.E+02 | 5.E+02 | 0 | 0 | 0 | 0 | 0 | 0 | 0 | 4.E+02 | DFG |  |
| **2-Ethenylnapthalene** | 6.E+03 | 2.E+03 | 2.E+03 | 0 | 0 | 0 | 0 | 0 | 0 | 0 | 0 | 4.E+02 | 0 | 0 | 0 | 0 | 0 | Aromatic compound |  |
| **2-Ethyl-1-hexanol** | 2.E+03 | 4.E+03 | 2.E+02 | 0 | 5.E+02 | 0 | 0 | 0 | 0 | 0 | 0 | 0 | 0 | 0 | 0 | 0 | 6.E+02 | Alcohol |  |
| **2-Ethylhexyl hexyl ester sulphurous acid** | 7.E+03 | 0 | 0 | 0 | 9.E+02 | 5.E+03 | 0 | 0 | 0 | 0 | 0 | 0 | 3.E+03 | 0 | 0 | 0 | 0 | Sulphur containing compound |  |
| **2-Methoxy-1-(2-nitroethenyl)-3-(phenylmethoxy)-benzene** | 2.E+03 | 4.E+03 | 7.E+03 | 0 | 0 | 0 | 0 | 1.E+04 | 0 | 0 | 0 | 0 | 0 | 0 | 0 | 0 | 0 | DFG |  |
| **2-Methoxyfuran** | 0 | 0 | 6.E+02 | 0 | 0 | 0 | 0 | 8.E+02 | 0 | 0 | 0 | 4.E+02 | 3.E+02 | 0 | 5.E+02 | 0 | 0 | Ether |  |
| **2-Methyl-2-propanol** | 1.E+03 | 4.E+03 | 5.E+03 | 8.E+01 | 1.E+02 | 1.E+01 | 3.E+03 | 5.E+03 | 0 | 0 | 5.E+02 | 0 | 0 | 0 | 0 | 0 | 0 | Alcohol |  |
| **2-Phenyl-3-methyl-pyrrolo(2,3-b)pyrazine** | 1.E+04 | 5.E+03 | 3.E+03 | 0 | 0 | 0 | 2.E+05 | 1.E+05 | 4.E+04 | 2.E+04 | 3.E+04 | 0 | 0 | 0 | 0 | 0 | 0 | Nitrogen containing compound | *** |
| **2-Propenal** | 4.E+02 | 4.E+02 | 9.E+02 | 0 | 0 | 7.E+01 | 0 | 3.E+02 | 0 | 0 | 0 | 0 | 0 | 0 | 0 | 0 | 7.E+01 | Ketone |  |
| **2-Propenylbenzene** | 5.E+02 | 2.E+03 | 1.E+03 | 0 | 0 | 0 | 1.E+03 | 5.E+03 | 6.E+02 | 0 | 3.E+02 | 0 | 0 | 0 | 0 | 0 | 0 | Aromatic compound | * |
| **2-tert-butyl-5-(2-methylprop-2-en-1-yl)cyclohexa-2,5-diene-1,4-dione** | 7.E+01 | 5.E+02 | 8.E+01 | 0 | 2.E+02 | 4.E+01 | 0 | 0 | 0 | 0 | 0 | 0 | 0 | 0 | 0 | 0 | 0 | Ketone |  |
| **3,3,5-Trimethylcyclohexyl methacrylate** | 3.E+04 | 8.E+03 | 7.E+03 | 0 | 0 | 0 | 0 | 0 | 0 | 0 | 0 | 0 | 0 | 0 | 0 | 0 | 0 | Ester |  |
| **3,4-Dimethyldihydrofuran-2,5-dione** | 0 | 0 | 0 | 0 | 0 | 0 | 0 | 3.E+02 | 0 | 0 | 6.E+00 | 0 | 7.E+01 | 0 | 4.E+02 | 0 | 1.E+02 | Ester |  |
| **3-[(2,4-dichlorophenyl)methoxy]-benzaldehyde** | 0 | 0 | 0 | 0 | 2.E+02 | 0 | 1.E+02 | 2.E+02 | 0 | 0 | 8.E+01 | 0 | 0 | 0 | 0 | 0 | 0 | DFG |  |
| **3-ethenyl-2-ethoxypyrazine** | 4.E+02 | 3.E+02 | 2.E+02 | 3.E+01 | 0 | 1.E+02 | 9.E+02 | 5.E+02 | 2.E+02 | 8.E+01 | 9.E+01 | 0 | 1.E+02 | 0 | 1.E+02 | 0 | 1.E+02 | DFG |  |
| **3-Methoxypropanenitrile** | 3.E+03 | 1.E+03 | 5.E+03 | 0 | 1.E+03 | 0 | 0 | 3.E+03 | 0 | 0 | 0 | 0 | 1.E+03 | 0 | 2.E+03 | 0 | 0 | DFG |  |
| **3-Methylfuran** | 5.E+02 | 2.E+02 | 0 | 0 | 8.E+01 | 0 | 2.E+01 | 2.E+00 | 0 | 0 | 0 | 0 | 0 | 0 | 3.E+02 | 0 | 0 | Ether |  |
| **3-Tetradecyne** | 0 | 4.E+02 | 8.E+02 | 0 | 5.E+01 | 7.E+02 | 0 | 0 | 2.E+02 | 0 | 0 | 0 | 0 | 0 | 7.E+01 | 0 | 3.E+02 | Alkyne |  |
| **4-(Phenylmethyl)benzeneethanamine** | 3.E+02 | 0 | 4.E+02 | 0 | 0 | 2.E+01 | 0 | 0 | 0 | 0 | 0 | 0 | 0 | 0 | 5.E+01 | 0 | 1.E+02 | Nitrogen containing compound |  |
| **4-Azidoheptane** | 0 | 0 | 0 | 0 | 0 | 0 | 5.E+02 | 6.E+02 | 0 | 0 | 0 | 2.E+02 | 2.E+02 | 0 | 1.E+01 | 0 | 0 | Nitrogen containing compound |  |
| **4-Ethylbenzoic acid, pentyl ester** | 4.E+02 | 4.E+02 | 5.E+02 | 0 | 0 | 0 | 2.E+03 | 1.E+03 | 0 | 0 | 0 | 0 | 0 | 0 | 0 | 0 | 0 | Ester |  |
| **5-Undecyne** | 8.E+02 | 4.E+02 | 3.E+02 | 0 | 0 | 6.E+02 | 2.E+02 | 0 | 4.E+02 | 0 | 0 | 0 | 0 | 0 | 4.E+02 | 0 | 6.E+02 | Alkyne |  |
| **6-Amino-1-hexanol, N,N-dimethyl-, methyl ether** | 0 | 0 | 0 | 0 | 0 | 0 | 6.E+01 | 4.E+02 | 1.E+03 | 0 | 0 | 0 | 0 | 0 | 1.E+02 | 0 | 0 | DFG |  |
| **6-Methyl-triazolo(2,3-b)(1,2,4)-triazine** | 3.E+02 | 4.E+02 | 2.E+02 | 0 | 0 | 1.E+02 | 9.E+02 | 1.E+03 | 8.E+02 | 2.E+02 | 3.E+02 | 0 | 0 | 0 | 0 | 0 | 0 | Nitrogen containing compound | * |
| **Acetaldehyde** | 0 | 0 | 0 | 1.E+03 | 0 | 0 | 9.E+02 | 4.E+03 | 2.E+03 | 0 | 2.E+03 | 7.E+02 | 0 | 0 | 0 | 0 | 2.E+03 | Aldehyde |  |

**Table S3** (cont.):

| **Acetone** | 8.E+03 | 8.E+03 | 4.E+03 | 0 | 0 | 0 | 1.E+04 | 1.E+04 | 1.E+03 | 3.E+02 | 2.E+03 | 0 | 0 | 0 | 3.E+03 | 0 | 0 | Aldehyde | * |
| --- | --- | --- | --- | --- | --- | --- | --- | --- | --- | --- | --- | --- | --- | --- | --- | --- | --- | --- | --- |
| **Benzaldehyde** | 2.E+03 | 2.E+03 | 1.E+03 | 0 | 0 | 0 | 0 | 2.E+03 | 0 | 0 | 0 | 0 | 0 | 0 | 4.E+02 | 0 | 0 | Aldehyde |  |
| **Benzene** | 1.E+03 | 1.E+03 | 5.E+02 | 0 | 0 | 0 | 9.E+02 | 1.E+03 | 0 | 0 | 0 | 0 | 0 | 0 | 0 | 0 | 0 | Aromatic compound |  |
| **Benzene, 1,3-bis(1-methylethyl)-** | 8.E+02 | 4.E+02 | 4.E+02 | 0 | 0 | 0 | 1.E+03 | 7.E+02 | 5.E+01 | 0 | 0 | 3.E+01 | 0 | 0 | 0 | 0 | 0 | Aromatic compound |  |
| **Benzeneacetaldehyde** | 1.E+03 | 1.E+03 | 6.E+02 | 0 | 0 | 0 | 7.E+02 | 3.E+03 | 0 | 0 | 0 | 0 | 0 | 0 | 0 | 0 | 0 | Aldehyde |  |
| **Benzeneacetic acid, a-amino-, methyl ester** | 0 | 2.E+02 | 2.E+02 | 8.E+01 | 0 | 4.E+00 | 2.E+02 | 0 | 1.E+02 | 0 | 0 | 0 | 1.E+02 | 0 | 2.E+02 | 0 | 0 | DFG |  |
| **Bicyclo[4.2.0]octa-1,3,5-triene-7,8-dione** | 6.E+00 | 3.E+02 | 6.E+01 | 0 | 0 | 0 | 1.E+02 | 2.E+02 | 0 | 0 | 0 | 0 | 0 | 0 | 0 | 0 | 0 | Aldehyde |  |
| **Bromochlorodifluoromethane** | 0 | 0 | 0 | 0 | 0 | 9.E+01 | 3.E+02 | 0 | 0 | 6.E+01 | 0 | 4.E+01 | 2.E+00 | 0 | 5.E+01 | 0 | 4.E+01 | Halogenated hydrocarbon |  |
| **Bromodichloromethane** | 6.E+02 | 8.E+02 | 7.E+02 | 0 | 0 | 0 | 8.E+02 | 3.E+03 | 2.E+02 | 0 | 2.E+02 | 0 | 0 | 0 | 0 | 0 | 0 | Halogenated hydrocarbon |  |
| **Butanal** | 4.E+02 | 3.E+02 | 0 | 0 | 1.E+02 | 0 | 0 | 0 | 0 | 0 | 0 | 0 | 0 | 0 | 0 | 0 | 0 | Aldehyde |  |
| **Chlorobenzene-d5** | 1.E+02 | 2.E+03 | 2.E+03 | 0 | 0 | 0 | 2.E+03 | 3.E+03 | 8.E+01 | 0 | 0 | 0 | 0 | 0 | 0 | 0 | 0 | Halogenated hydrocarbon |  |
| **cis-Calamenene** | 1.E+03 | 9.E+02 | 8.E+02 | 2.E+02 | 0 | 0 | 8.E+02 | 1.E+03 | 2.E+02 | 0 | 0 | 0 | 0 | 0 | 0 | 0 | 1.E+02 | Aromatic compound |  |
| **Cyanamide, (dimethylphenylphosphoranylidene)-** | 0 | 0 | 7.E+02 | 0 | 0 | 0 | 5.E+02 | 8.E+02 | 0 | 2.E+02 | 2.E+02 | 1.E+02 | 0 | 0 | 0 | 0 | 0 | DFG |  |
| **Cyclohexanone** | 2.E+03 | 3.E+03 | 3.E+03 | 0 | 0 | 0 | 5.E+03 | 7.E+03 | 1.E+03 | 0 | 1.E+03 | 0 | 3.E+02 | 0 | 5.E+02 | 0 | 0 | Ketone |  |
| **Cyclopropa[3,4]pentaleno[1,2-d][1,3]dioxole, 2a,2b,2c,5a,5b,5c-hexahydro-, (2aa,2ba,2ca,5aa,5ba,5ca)-** | 8.E+02 | 4.E+02 | 7.E+02 | 4.E+01 | 0 | 2.E+02 | 1.E+02 | 0 | 9.E+01 | 0 | 0 | 0 | 0 | 0 | 3.E+01 | 0 | 4.E+02 | Ether |  |
| **Decanal** | 0 | 4.E+02 | 1.E+03 | 0 | 0 | 4.E+02 | 0 | 0 | 2.E+02 | 0 | 0 | 0 | 0 | 0 | 2.E+01 | 0 | 5.E+02 | Aldehyde |  |
| **Dibromochloromethane** | 2.E+03 | 7.E+02 | 8.E+02 | 0 | 0 | 0 | 6.E+02 | 4.E+03 | 3.E+02 | 0 | 2.E+02 | 0 | 0 | 0 | 0 | 0 | 0 | Halogenated hydrocarbon |  |
| **Dibromomethane** | 4.E+02 | 7.E+02 | 1.E+03 | 0 | 3.E+02 | 0 | 6.E+02 | 1.E+03 | 1.E+02 | 2.E+02 | 5.E+02 | 0 | 0 | 0 | 0 | 0 | 0 | Halogenated hydrocarbon | * |
| **Diethyl-, ethyl ester carbamodithioic acid** | 5.E+02 | 4.E+02 | 6.E+02 | 0 | 0 | 5.E+01 | 0 | 0 | 2.E+02 | 0 | 0 | 0 | 2.E+02 | 0 | 3.E+02 | 0 | 0 | DFG |  |
| **Dimethyl disulphide** | 0 | 2.E+02 | 3.E+02 | 0 | 2.E+03 | 0 | 0 | 4.E+02 | 0 | 0 | 0 | 0 | 0 | 0 | 2.E+02 | 0 | 0 | Sulphur containing compound |  |
| **Dimethyl-arsinic acid** | 5.E+02 | 2.E+02 | 2.E+02 | 0 | 3.E+01 | 2.E+02 | 0 | 6.E+02 | 4.E+01 | 0 | 0 | 3.E+00 | 3.E+01 | 0 | 1.E+02 | 0 | 0 | DFG |  |
| **Diphenylmethane** | 8.E+02 | 3.E+02 | 2.E+02 | 0 | 0 | 0 | 5.E+01 | 7.E+01 | 0 | 0 | 0 | 0 | 0 | 0 | 0 | 0 | 3.E+00 | Aromatic compound |  |
| **Di-tert-butyl peroxide** | 3.E+03 | 5.E+02 | 5.E+02 | 0 | 4.E+02 | 0 | 3.E+03 | 3.E+03 | 2.E+02 | 3.E+01 | 3.E+02 | 0 | 0 | 0 | 0 | 0 | 0 | Ether | * |
| **Heptane, 2,5,5-trimethyl** | 5.E+02 | 5.E+02 | 3.E+02 | 0 | 0 | 0 | 2.E+03 | 1.E+03 | 0 | 0 | 4.E+01 | 0 | 0 | 0 | 3.E+02 | 0 | 0 | Alkane |  |
| **Hexadecane** | 0 | 4.E+03 | 0 | 0 | 0 | 0 | 0 | 0 | 0 | 0 | 0 | 0 | 0 | 2.E+04 | 0 | 2.E+03 | 4.E+03 | Alkane | * |
| **Hexanal** | 3.E+02 | 3.E+02 | 4.E+02 | 0 | 0 | 0 | 3.E+02 | 0 | 0 | 0 | 0 | 0 | 0 | 0 | 8.E+01 | 0 | 0 | Aldehyde |  |
| **Histamine, N-acetyl-5-bromo-** | 1.E+02 | 2.E+01 | 9.E+01 | 0 | 0 | 0 | 0 | 1.E+02 | 0 | 0 | 0 | 0 | 0 | 0 | 1.E+01 | 0 | 0 | DFG |  |
| **Homosalate** | 3.E+02 | 2.E+02 | 6.E+01 | 0 | 0 | 0 | 9.E+01 | 2.E+02 | 3.E+02 | 0 | 1.E+01 | 0 | 0 | 0 | 3.E+02 | 0 | 2.E+01 | DFG |  |
| **Isocyanatomethane** | 0 | 2.E+03 | 0 | 1.E+03 | 0 | 0 | 3.E+03 | 0 | 8.E+02 | 3.E+02 | 4.E+02 | 7.E+02 | 3.E+02 | 0 | 6.E+02 | 0 | 4.E+02 | DFG |  |
| **Isolongifoline** | 5.E+03 | 0 | 0 | 0 | 0 | 3.E+03 | 1.E+04 | 1.E+03 | 3.E+03 | 1.E+03 | 0 | 4.E+02 | 8.E+03 | 0 | 1.E+03 | 0 | 8.E+02 | Alkene |  |
| **Methyl N-hydroxybenzenecarboximidoate** | 6.E+03 | 6.E+02 | 2.E+04 | 0 | 0 | 0 | 0 | 3.E+04 | 0 | 0 | 0 | 0 | 0 | 0 | 0 | 0 | 0 | DFG |  |
| **Methylal** | 1.E+03 | 2.E+03 | 2.E+03 | 4.E+02 | 6.E+01 | 7.E+01 | 6.E+02 | 3.E+03 | 2.E+02 | 0 | 0 | 0 | 0 | 0 | 0 | 0 | 0 | Ether |  |
| **Methylene chloride** | 0 | 2.E+02 | 2.E+02 | 1.E+02 | 0 | 4.E+01 | 0 | 4.E+02 | 0 | 0 | 6.E+00 | 6.E+01 | 0 | 0 | 5.E+01 | 0 | 0 | Halogenated hydrocarbon |  |
| **Monoacetate tetraethylene glycol** | 4.E+01 | 2.E+02 | 2.E+02 | 0 | 0 | 0 | 0 | 3.E+02 | 0 | 0 | 0 | 0 | 0 | 0 | 0 | 0 | 0 | DFG |  |
| **N-(4-methoxybenzyl)-thiazol-2-amine** | 1.E+02 | 1.E+02 | 2.E+02 | 0 | 0 | 0 | 6.E+01 | 4.E+02 | 1.E+02 | 0 | 0 | 0 | 0 | 0 | 0 | 0 | 0 | DFG |  |
| **Naphtho[2,1-b]furan** | 2.E+02 | 3.E+02 | 7.E+01 | 0 | 0 | 0 | 0 | 0 | 0 | 0 | 0 | 0 | 0 | 0 | 0 | 0 | 1.E+02 | Ether |  |
| **Napthalene** | 1.E+04 | 8.E+03 | 9.E+03 | 0 | 0 | 0 | 8.E+03 | 3.E+04 | 7.E+03 | 0 | 2.E+02 | 0 | 0 | 0 | 0 | 0 | 0 | Aromatic compound | * |
| **Neopentyl ester butyric acid** | 4.E+02 | 4.E+02 | 0 | 0 | 3.E+01 | 0 | 2.E+03 | 2.E+03 | 0 | 2.E+02 | 0 | 3.E+02 | 0 | 0 | 0 | 0 | 0 | Ester |  |
| **n-Hexane** | 4.E+02 | 2.E+02 | 0 | 0 | 5.E+01 | 0 | 0 | 2.E+02 | 0 | 0 | 0 | 6.E+01 | 0 | 0 | 0 | 0 | 0 | Alkane |  |

**Table S3 (cont.):**

| **N-Methylisatoic anhydride** | 7.E+02 | 5.E+02 | 1.E+03 | 0 | 0 | 0 | 0 | 0 | 2.E+02 | 0 | 0 | 0 | 0 | 0 | 4.E+02 | 0 | 0 | DFG |  |
| --- | --- | --- | --- | --- | --- | --- | --- | --- | --- | --- | --- | --- | --- | --- | --- | --- | --- | --- | --- |
| **Nonanal** | 2.E+03 | 3.E+03 | 2.E+03 | 0 | 0 | 0 | 3.E+03 | 5.E+02 | 2.E+02 | 0 | 0 | 0 | 0 | 0 | 7.E+02 | 0 | 0 | Aldehyde |  |
| **Octanal** | 8.E+01 | 7.E+02 | 1.E+03 | 0 | 0 | 0 | 2.E+03 | 5.E+02 | 0 | 0 | 0 | 0 | 0 | 0 | 1.E+02 | 0 | 0 | Aldehyde |  |
| **o-Cymene_a** | 2.E+03 | 2.E+03 | 1.E+02 | 0 | 0 | 0 | 9.E+02 | 5.E+03 | 4.E+02 | 0 | 0 | 0 | 0 | 0 | 0 | 0 | 0 | Aromatic compound |  |
| **o-Cymene_c** | 1.E+03 | 5.E+02 | 9.E+02 | 0 | 0 | 0 | 4.E+02 | 2.E+03 | 0 | 0 | 0 | 0 | 0 | 0 | 0 | 0 | 0 | Aromatic compound |  |
| **o-Cymene_d** | 8.E+02 | 4.E+02 | 1.E+02 | 0 | 0 | 0 | 2.E+02 | 2.E+03 | 0 | 0 | 0 | 0 | 0 | 0 | 0 | 0 | 0 | Aromatic compound |  |
| **p-Xylene** | 2.E+03 | 2.E+03 | 2.E+03 | 0 | 0 | 0 | 3.E+03 | 6.E+03 | 2.E+01 | 0 | 0 | 0 | 0 | 0 | 0 | 0 | 0 | Aromatic compound |  |
| **Pyrrolo(2,3-b)pyrazine** | 1.E+03 | 5.E+02 | 6.E+02 | 2.E+01 | 0 | 6.E+02 | 0 | 0 | 0 | 0 | 0 | 0 | 0 | 0 | 1.E+02 | 0 | 1.E+03 | Nitrogen containing compound |  |
| **s-Triazole, 3-chloro-** | 0 | 0 | 0 | 0 | 0 | 3.E+02 | 5.E+02 | 7.E+02 | 0 | 1.E+02 | 1.E+02 | 0 | 0 | 0 | 0 | 0 | 4.E+02 | DFG |  |
| **Styrene** | 2.E+03 | 2.E+03 | 1.E+03 | 0 | 0 | 0 | 2.E+03 | 4.E+03 | 2.E+02 | 0 | 4.E+02 | 4.E+02 | 9.E+01 | 0 | 1.E+02 | 0 | 0 | Aromatic compound |  |
| **Tetrachloroethylene** | 7.E+01 | 8.E+01 | 0 | 0 | 0 | 0 | 5.E+01 | 7.E+01 | 0 | 0 | 2.E+00 | 4.E+01 | 3.E+01 | 0 | 2.E+01 | 0 | 0 | Halogenated hydrocarbon |  |
| **Tetradecafluorohexane** | 2.E+02 | 3.E+02 | 2.E+02 | 3.E+01 | 0 | 0 | 0 | 0 | 0 | 0 | 0 | 0 | 0 | 0 | 0 | 0 | 0 | Halogenated hydrocarbon |  |
| **Tetradecane** | 3.E+02 | 1.E+03 | 2.E+03 | 0 | 0 | 4.E+03 | 60216.14 | 0 | 0 | 0 | 0 | 0 | 0 | 0 | 1.E+03 | 2.E+02 | 1.E+03 | Alkane |  |
| **Tetradecanoic acid, 10,13-dimethyl-, methyl ester** | 3.E+02 | 1.E+02 | 3.E+02 | 0 | 0 | 2.E+02 | 0 | 0 | 0 | 0 | 0 | 0 | 0 | 0 | 0 | 0 | 4.E+02 | Ester |  |
| **Tolazoline acetate** | 2.E+02 | 2.E+02 | 2.E+02 | 3.E+00 | 0 | 0 | 1.E+02 | 2.E+02 | 7.E+01 | 3.E+01 | 2.E+01 | 5.E+01 | 4.E+01 | 0 | 0 | 0 | 0 | DFG |  |
| **Toluene** | 8.E+03 | 8.E+03 | 9.E+03 | 0 | 0 | 0 | 1.E+04 | 1.E+04 | 2.E+02 | 0 | 0 | 0 | 0 | 0 | 0 | 0 | 0 | Aromatic compound |  |
| **Tribromomethane** | 3.E+03 | 2.E+03 | 7.E+02 | 0 | 0 | 0 | 2.E+03 | 9.E+03 | 6.E+02 | 0 | 0 | 0 | 0 | 0 | 0 | 0 | 0 | Halogenated hydrocarbon |  |
| **Trichloromethane** | 9.E+02 | 1.E+03 | 1.E+03 | 0 | 0 | 0 | 1.E+03 | 4.E+03 | 4.E+02 | 0 | 0 | 0 | 0 | 0 | 0 | 0 | 0 | Halogenated hydrocarbon |  |
| **Tridecane** | 0 | 1.E+03 | 0 | 0 | 0 | 2.E+03 | 1.E+03 | 0 | 4.E+02 | 0 | 4.E+02 | 0 | 0 | 0 | 0 | 0 | 0 | Alkane |  |
| **UC_11.64** | 5.E+01 | 7.E+01 | 7.E+01 | 0 | 0 | 0 | 0 | 0 | 0 | 0 | 0 | 0 | 0 | 0 | 0 | 0 | 0 | Unclassified |  |
| **UC_11.82** | 2.E+02 | 4.E+02 | 3.E+02 | 0 | 0 | 0 | 0 | 9.E+01 | 0 | 0 | 0 | 4.E+01 | 6.E+01 | 0 | 0 | 0 | 0 | Unclassified |  |
| **UC_17.19** | 9.E+01 | 1.E+02 | 1.E+02 | 0 | 2.E+01 | 0 | 0 | 0 | 0 | 0 | 0 | 0 | 0 | 0 | 0 | 0 | 0 | Unclassified |  |
| **UC_40.63** | 6.E+03 | 4.E+03 | 3.E+03 | 0 | 0 | 0 | 0 | 0 | 0 | 0 | 0 | 1.E+02 | 0 | 0 | 1.E+02 | 0 | 0 | Unclassified |  |
| **UC_42.05** | 2.E+03 | 7.E+02 | 4.E+02 | 0 | 0 | 0 | 4.E+03 | 3.E+03 | 7.E+02 | 3.E+02 | 4.E+02 | 5.E+02 | 0 | 0 | 0 | 0 | 1.E+01 | Unclassified |  |
| **UC_42.51** | 0 | 0 | 0 | 0 | 0 | 0 | 9.E+01 | 2.E+02 | 0 | 3.E+01 | 0 | 0 | 8.E+01 | 0 | 6.E+01 | 0 | 0 | Unclassified |  |
| **UC_42.58** | 5.E+02 | 4.E+02 | 0 | 0 | 0 | 0 | 6.E+02 | 4.E+02 | 9.E+01 | 0 | 0 | 0 | 7.E+01 | 0 | 8.E+01 | 0 | 0 | Unclassified |  |
| **UC_43.08** | 8.E+02 | 9.E+02 | 1.E+03 | 2.E+02 | 0 | 4.E+01 | 0 | 2.E+02 | 2.E+02 | 0 | 0 | 2.E+02 | 3.E+02 | 0 | 4.E+02 | 0 | 4.E+01 | Unclassified |  |
| **UC_43.20** | 4.E+02 | 5.E+02 | 2.E+02 | 0 | 0 | 0 | 0 | 0 | 0 | 0 | 0 | 0 | 0 | 0 | 2.E+02 | 0 | 0 | Unclassified |  |
| **UC_43.63** | 3.E+02 | 3.E+02 | 8.E+02 | 2.E+02 | 4.E+01 | 0 | 0 | 0 | 1.E+02 | 0 | 0 | 0 | 0 | 0 | 0 | 0 | 0 | Unclassified |  |
| **UC_43.76** | 4.E+00 | 0 | 7.E+01 | 0 | 0 | 0 | 0 | 0 | 0 | 0 | 0 | 1.E+01 | 4.E-01 | 0 | 2.E+01 | 0 | 0 | Unclassified |  |
| **UC_43.82** | 2.E+02 | 1.E+02 | 5.E+02 | 0 | 0 | 8.E+01 | 0 | 0 | 4.E+00 | 0 | 0 | 0 | 0 | 0 | 7.E+01 | 0 | 1.E+02 | Unclassified |  |
| **UC_44.09** | 2.E+00 | 3.E+01 | 0 | 0 | 0 | 0 | 5.E+02 | 5.E+02 | 2.E+02 | 0 | 0 | 0 | 0 | 0 | 0 | 0 | 0 | Unclassified |  |
| **UC_44.34** | 3.E+02 | 0 | 0 | 4.E+00 | 0 | 2.E+02 | 0 | 2.E+02 | 2.E+02 | 0 | 0 | 0 | 1.E+02 | 0 | 4.E+02 | 0 | 0 | Unclassified |  |
| **UC_44.56** | 3.E+02 | 0 | 2.E+02 | 0 | 0 | 2.E+02 | 4.E+02 | 6.E+02 | 3.E+02 | 2.E+02 | 1.E+02 | 0 | 0 | 0 | 6.E+01 | 0 | 0 | Unclassified |  |
| **UC_45.57** | 1.E+03 | 0 | 6.E+01 | 0 | 0 | 5.E+01 | 6.E+02 | 5.E+02 | 3.E+02 | 0 | 1.E+02 | 0 | 0 | 0 | 0 | 0 | 3.E+02 | Unclassified |  |
| **UC_45.72** | 5.E+02 | 5.E+02 | 0 | 0 | 5.E+01 | 0 | 4.E+02 | 1.E+02 | 4.E+01 | 0 | 0 | 1.E+02 | 3.E+01 | 0 | 2.E+02 | 0 | 0 | Unclassified |  |
| **UC_45.88** | 0 | 2.E+02 | 0 | 3.E+01 | 0 | 0 | 1.E+02 | 3.E+02 | 6.E+01 | 0 | 0 | 0 | 2.E+01 | 0 | 3.E+01 | 0 | 1.E+02 | Unclassified |  |
| **UC_45.93** | 3.E+02 | 3.E+02 | 4.E+02 | 0 | 4.E+01 | 2.E+02 | 0 | 2.E+02 | 2.E+02 | 0 | 0 | 0 | 0 | 0 | 3.E+02 | 0 | 0 | Unclassified |  |
| **UC_46.33** | 2.E+03 | 2.E+03 | 1.E+03 | 0 | 8.E+01 | 0 | 4.E+03 | 0 | 1.E+03 | 0 | 0 | 2.E+02 | 0 | 0 | 0 | 0 | 0 | Unclassified |  |
| **UC_46.80** | 0 | 0 | 0 | 0 | 1.E+02 | 0 | 0 | 0 | 0 | 0 | 0 | 0 | 0 | 7.E+01 | 2.E+02 | 0 | 2.E+02 | Unclassified |  |
| **UC_9.22** | 6.E+03 | 6.E+03 | 5.E+03 | 0 | 0 | 0 | 0 | 0 | 0 | 0 | 0 | 0 | 0 | 0 | 1.E+03 | 0 | 0 | Unclassified |  |

**Table S4:** BVOCs detected throughout symbiotic dataset. All BVOCs (peak normalised to protein content) and their chemical classes that were detected in symbiotic anemones at three different temperature treatments (control: 25 °C, sub-bleaching: 30 °C and bleaching: 33.5 °C). BVOCs had to be detected in at least three replicates in at least one temperature condition to be included. Chemical class was determined based on the molecule’s functional group(s). Significance was determined using differential abundance testing and the number of asterisks denotes the size of the adjusted p-value: *<0.05, **<0.01, ***<0.001.

| **BVOC** | **Control Aposymbiotic** | | | | | | **Mid Aposymbiotic** | | | | | **Heat Aposymbiotic** | | | | | | **Functional group** | **Significance** |
| --- | --- | --- | --- | --- | --- | --- | --- | --- | --- | --- | --- | --- | --- | --- | --- | --- | --- | --- | --- |
| **(1-Methylethyl)-benzene** | 2.E+03 | 9.E+02 | 2.E+03 | 0 | 0 | 0 | 3.E+03 | 1.E+03 | 0 | 0 | 3.E+01 | 5.E+02 | 3.E+01 | 0 | 2.E+01 | 0 | 0 | Aromatic compound |  |
| **(E)-1-Propenylaziridine** | 0 | 3.E+02 | 4.E+02 | 0 | 0 | 8.E+02 | 0 | 0 | 2.E+02 | 0 | 0 | 0 | 0 | 0 | 6.E+01 | 0 | 3.E+02 | Nitrogen containing compound |  |
| **1-(2-Pyridyl)piperazine** | 0 | 0 | 0 | 0 | 0 | 3.E+02 | 0 | 4.E+02 | 1.E+03 | 0 | 0 | 7.E+01 | 1.E+02 | 0 | 1.E+03 | 0 | 2.E+02 | Nitrogen containing compound |  |
| **1,1,2,2,3,3-Hexamethylindane** | 0 | 2.E+02 | 2.E+02 | 0 | 0 | 8.E+00 | 2.E+02 | 0 | 0 | 0 | 0 | 0 | 0 | 0 | 4.E+01 | 0 | 0 | Aromatic compound |  |
| **1,1-dimethyl ester butanoic acid** | 0 | 0 | 0 | 0 | 9.E+01 | 0 | 1.E+03 | 9.E+02 | 0 | 0 | 0 | 2.E+02 | 1.E+02 | 0 | 4.E+02 | 0 | 0 | Ester |  |
| **1,2,3-Trimethylbenzene** | 5.E+03 | 6.E+03 | 4.E+03 | 0 | 0 | 0 | 4.E+03 | 2.E+04 | 2.E+03 | 0 | 0 | 0 | 0 | 0 | 0 | 0 | 0 | Aromatic compound |  |
| **1,2,3-Trimethylindene** | 0 | 3.E+02 | 0 | 0 | 1.E+01 | 0 | 7.E+02 | 8.E+02 | 2.E+02 | 8.E+01 | 2.E+02 | 0 | 0 | 0 | 0 | 0 | 0 | Aromatic compound | * |
| **1,2,4-Trimethylbenzene** | 2.E+04 | 2.E+04 | 2.E+04 | 0 | 0 | 0 | 2.E+04 | 7.E+04 | 1.E+04 | 0 | 0 | 0 | 0 | 0 | 0 | 0 | 0 | Aromatic compound | * |
| **1,2-Dichloroethane** | 2.E+03 | 3.E+03 | 5.E+03 | 0 | 0 | 0 | 5.E+03 | 2.E+04 | 7.E+02 | 0 | 5.E+02 | 0 | 0 | 0 | 0 | 0 | 0 | Halogenated hydrocarbon | * |
| **1,2-Dimethylhydrindene** | 1.E+02 | 2.E+02 | 1.E+02 | 0 | 0 | 0 | 2.E+02 | 4.E+02 | 0 | 0 | 0 | 0 | 0 | 0 | 0 | 0 | 0 | Aromatic compound |  |
| **Ethylbenzene** | 1.E+03 | 1.E+03 | 1.E+03 | 0 | 3.E+02 | 0 | 7.E+02 | 7.E+02 | 0 | 0 | 0 | 0 | 0 | 0 | 0 | 0 | 0 | Aromatic compound |  |
| **1,3-Dimethylbenzene** | 3.E+03 | 3.E+03 | 3.E+03 | 0 | 0 | 0 | 4.E+03 | 5.E+03 | 0 | 0 | 0 | 0 | 0 | 0 | 0 | 0 | 0 | Aromatic compound |  |
| **1,4-Dioxaspiro[4,5]decane** | 2.E+03 | 3.E+03 | 3.E+03 | 0 | 0 | 0 | 5.E+03 | 7.E+03 | 9.E+01 | 0 | 0 | 0 | 0 | 0 | 0 | 0 | 0 | Ether |  |
| **1,6,7-Trimethylnapthalene** | 6.E+02 | 6.E+02 | 2.E+02 | 7.E+00 | 0 | 2.E+02 | 0 | 0 | 0 | 0 | 0 | 0 | 0 | 0 | 1.E+02 | 0 | 3.E+02 | Aromatic compound |  |
| **1-Acetyl-4-(4-propylcyclohexyl)-benzene** | 0 | 2.E+02 | 1.E+02 | 6.E+01 | 0 | 0 | 0 | 0 | 0 | 0 | 0 | 0 | 0 | 0 | 0 | 0 | 0 | Ketone |  |
| **1-Ethyl-2,4-dimethylbenzene** | 1.E+03 | 9.E+02 | 1.E+02 | 0 | 0 | 0 | 3.E+02 | 3.E+03 | 0 | 0 | 0 | 0 | 0 | 0 | 0 | 0 | 0 | Aromatic compound |  |
| **1-Ethyl-2-methylbenzene** | 2.E+03 | 2.E+03 | 1.E+03 | 0 | 0 | 0 | 1.E+03 | 4.E+03 | 2.E+02 | 0 | 0 | 0 | 0 | 0 | 0 | 0 | 0 | Aromatic compound |  |
| **1-ethyl-4-methylbenzene** | 4.E+03 | 3.E+03 | 3.E+03 | 0 | 0 | 0 | 3.E+03 | 1.E+04 | 3.E+02 | 0 | 0 | 0 | 0 | 0 | 0 | 0 | 0 | Aromatic compound |  |
| **1H-Indane, 2,3-dihydro-4,7-dimethyl-** | 3.E+02 | 1.E+02 | 3.E+01 | 0 | 0 | 0 | 2.E+02 | 5.E+02 | 0 | 0 | 0 | 0 | 0 | 0 | 0 | 0 | 0 | Aromatic compound |  |
| **1H-Indene, 2,3-dihydro-1,1,3-trimethyl-** | 0 | 4.E+02 | 0 | 0 | 0 | 0 | 4.E+02 | 3.E+02 | 0 | 0 | 2.E+02 | 0 | 0 | 0 | 0 | 0 | 0 | Aromatic compound |  |
| **1H-Indene, 2,3-dihydro-4,7-dimethyl-** | 0 | 5.E+01 | 3.E+01 | 0 | 0 | 0 | 2.E+02 | 1.E+02 | 2.E+01 | 0 | 1.E+01 | 1.E+01 | 0 | 0 | 0 | 0 | 0 | Aromatic compound |  |
| **1H-Indole-5-carbonitrile** | 1.E+04 | 4.E+03 | 4.E+03 | 0 | 0 | 0 | 0 | 0 | 0 | 0 | 0 | 0 | 0 | 0 | 0 | 0 | 0 | Nitrogen containing compound |  |
| **1-Iodododecane** | 2.E+04 | 6.E+04 | 0 | 0 | 0 | 0 | 5.E+04 | 2.E+04 | 0 | 0 | 2.E+04 | 6.E+03 | 1.E+04 | 1.E+04 | 0 | 2.E+03 | 0 | Halogenated hydrocarbon |  |
| **1-Isopropyl-3,4-dimethyl-2-pyrazoline** | 4.E+02 | 3.E+02 | 3.E+02 | 0 | 0 | 0 | 1.E+03 | 3.E+03 | 0 | 0 | 0 | 0 | 0 | 0 | 0 | 0 | 0 | Nitrogen containing compound |  |
| **1-Methoxy-2,3-dimethylaziridine** | 2.E+02 | 3.E+02 | 5.E+02 | 0 | 0 | 0 | 7.E+01 | 4.E+01 | 0 | 0 | 0 | 0 | 0 | 0 | 1.E+02 | 0 | 0 | DFG |  |
| **1-Methyl-1H-2,3-benzodiazepine** | 0 | 0 | 0 | 0 | 0 | 0 | 4.E+02 | 0 | 0 | 0 | 5.E+01 | 3.E+01 | 7.E+01 | 0 | 7.E+01 | 0 | 0 | Nitrogen containing compound |  |
| **1-Methyl-1H-pyrrole** | 0 | 4.E+02 | 6.E+02 | 0 | 5.E+02 | 0 | 1.E+03 | 1.E+03 | 0 | 0 | 4.E+02 | 0 | 0 | 0 | 1.E+03 | 0 | 0 | Nitrogen containing compound |  |
| **1-Methyl-2-propylbenzene** | 1.E+03 | 6.E+02 | 1.E+02 | 0 | 0 | 0 | 0 | 1.E+03 | 0 | 0 | 0 | 0 | 0 | 0 | 4.E+02 | 0 | 0 | Aromatic compound |  |
| **1-Methylethyl ester dodenanoic acid** | 4.E+02 | 7.E+01 | 0 | 0 | 0 | 3.E+02 | 0 | 0 | 0 | 0 | 0 | 0 | 0 | 0 | 0 | 0 | 3.E+02 | Ester |  |
| **1-Nitro-4-(phenylmethoxy)-benzene** | 1.E+03 | 0 | 7.E+02 | 0 | 2.E+02 | 0 | 0 | 0 | 0 | 0 | 0 | 0 | 0 | 0 | 0 | 0 | 9.E+01 | DFG |  |
| **1-Phenyl-1,2-propanediol** | 4.E+02 | 2.E+02 | 0 | 0 | 9.E+01 | 0 | 0 | 0 | 0 | 0 | 0 | 0 | 0 | 0 | 2.E+02 | 0 | 0 | Alcohol |  |
| **2(3H)-Benzoxazolone** | 2.E+02 | 3.E+02 | 2.E+02 | 0 | 0 | 0 | 2.E+02 | 5.E+02 | 7.E+01 | 0 | 0 | 0 | 0 | 0 | 0 | 0 | 0 | DFG |  |
| **2,2,4-Trimethyl-1,3-pentanediol diisobutyrate** | 9.E+02 | 6.E+02 | 1.E+03 | 0 | 0 | 2.E+02 | 4.E+02 | 0 | 0 | 0 | 0 | 0 | 0 | 0 | 0 | 0 | 0 | Ester |  |
| **2,2-Dibromo-1-methyl-cyclopropanecarboxylic acid hydrazide** | 0 | 0 | 3.E+01 | 0 | 0 | 0 | 3.E+01 | 3.E+01 | 3.E+00 | 0 | 0 | 0 | 0 | 0 | 0 | 0 | 0 | DFG |  |
| **2,3-Dihydro-5-methyl-1H-indene** | 7.E+02 | 7.E+02 | 6.E+02 | 0 | 0 | 0 | 4.E+02 | 2.E+03 | 0 | 0 | 0 | 0 | 0 | 0 | 0 | 0 | 0 | Aromatic compound |  |
| **2,4-Dimethylstyrene** | 1.E+03 | 1.E+03 | 6.E+02 | 0 | 0 | 0 | 9.E+02 | 3.E+03 | 3.E+02 | 0 | 0 | 0 | 0 | 0 | 0 | 0 | 0 | Aromatic compound |  |
| **2,7,10-trimethyldodecane** | 0 | 0 | 0 | 0 | 0 | 0 | 3.E+03 | 0 | 0 | 0 | 0 | 1.E+03 | 2.E+03 | 2.E+03 | 0 | 1.E+04 | 9.E+01 | Alkane | *** |
| **2,7-Dimethylnapthalene** | 1.E+04 | 1.E+03 | 2.E+03 | 0 | 0 | 0 | 0 | 0 | 0 | 0 | 0 | 2.E+01 | 0 | 0 | 0 | 0 | 0 | Aromatic compound |  |

**Table S4 (cont.):**

| **2-[(1-(4-Methylphenyl)ethylidene)amino]benzonitrile** | 0 | 2.E+02 | 1.E+02 | 0 | 0 | 3.E+02 | 0 | 0 | 0 | 0 | 0 | 0 | 0 | 0 | 5.E+01 | 0 | 7.E+02 | Nitrogen containing compound |  |
| --- | --- | --- | --- | --- | --- | --- | --- | --- | --- | --- | --- | --- | --- | --- | --- | --- | --- | --- | --- |
| **2-[4-(1,1-dimethylpropyl)phenoxy]-ethanol** | 0 | 0 | 2.E+02 | 0 | 0 | 2.E+01 | 1.E+02 | 3.E+02 | 2.E+02 | 0 | 0 | 0 | 0 | 0 | 0 | 0 | 5.E+02 | DFG |  |
| **2-Acetyl-5-methylthiophene** | 8.E+02 | 7.E+02 | 7.E+02 | 0 | 0 | 0 | 1.E+02 | 0 | 0 | 0 | 1.E+00 | 0 | 0 | 0 | 6.E+00 | 0 | 0 | DFG |  |
| **2-Amino-5,7-dimethyl-[1,2,4]triazolo[1,5-a]pyrimidine** | 0 | 4.E+02 | 0 | 0 | 0 | 2.E+02 | 1.E+03 | 2.E+03 | 6.E+02 | 4.E+02 | 4.E+02 | 0 | 0 | 0 | 0 | 0 | 8.E+01 | Nitrogen containing compound | * |
| **2-Butanone** | 3.E+03 | 3.E+03 | 0 | 0 | 1.E+03 | 0 | 0 | 3.E+03 | 1.E+03 | 8.E+02 | 1.E+03 | 0 | 0 | 0 | 0 | 0 | 0 | Ketone | * |
| **2-Chloro-2,2-difluoro-1-phenylethanone** | 1.E+03 | 7.E+02 | 0 | 0 | 0 | 6.E+02 | 4.E+02 | 3.E+02 | 5.E+02 | 0 | 0 | 0 | 0 | 0 | 0 | 0 | 4.E+02 | DFG |  |
| **2-Ethenylnapthalene** | 6.E+03 | 2.E+03 | 2.E+03 | 0 | 0 | 0 | 0 | 0 | 0 | 0 | 0 | 4.E+02 | 0 | 0 | 0 | 0 | 0 | Aromatic compound |  |
| **2-Ethyl-1-hexanol** | 2.E+03 | 4.E+03 | 2.E+02 | 0 | 5.E+02 | 0 | 0 | 0 | 0 | 0 | 0 | 0 | 0 | 0 | 0 | 0 | 6.E+02 | Alcohol |  |
| **2-Ethylhexyl hexyl ester sulphurous acid** | 7.E+03 | 0 | 0 | 0 | 9.E+02 | 5.E+03 | 0 | 0 | 0 | 0 | 0 | 0 | 3.E+03 | 0 | 0 | 0 | 0 | Sulphur containing compound |  |
| **2-Methoxy-1-(2-nitroethenyl)-3-(phenylmethoxy)-benzene** | 2.E+03 | 4.E+03 | 7.E+03 | 0 | 0 | 0 | 0 | 1.E+04 | 0 | 0 | 0 | 0 | 0 | 0 | 0 | 0 | 0 | DFG |  |
| **2-Methoxyfuran** | 0 | 0 | 6.E+02 | 0 | 0 | 0 | 0 | 8.E+02 | 0 | 0 | 0 | 4.E+02 | 3.E+02 | 0 | 5.E+02 | 0 | 0 | Ether |  |
| **2-Methyl-2-propanol** | 1.E+03 | 4.E+03 | 5.E+03 | 8.E+01 | 1.E+02 | 1.E+01 | 3.E+03 | 5.E+03 | 0 | 0 | 5.E+02 | 0 | 0 | 0 | 0 | 0 | 0 | Alcohol |  |
| **2-Phenyl-3-methyl-pyrrolo(2,3-b)pyrazine** | 1.E+04 | 5.E+03 | 3.E+03 | 0 | 0 | 0 | 2.E+05 | 1.E+05 | 4.E+04 | 2.E+04 | 3.E+04 | 0 | 0 | 0 | 0 | 0 | 0 | Nitrogen containing compound | *** |
| **2-Propenal** | 4.E+02 | 4.E+02 | 9.E+02 | 0 | 0 | 7.E+01 | 0 | 3.E+02 | 0 | 0 | 0 | 0 | 0 | 0 | 0 | 0 | 7.E+01 | Ketone |  |
| **2-Propenylbenzene** | 5.E+02 | 2.E+03 | 1.E+03 | 0 | 0 | 0 | 1.E+03 | 5.E+03 | 6.E+02 | 0 | 3.E+02 | 0 | 0 | 0 | 0 | 0 | 0 | Aromatic compound | * |
| **2-tert-butyl-5-(2-methylprop-2-en-1-yl)cyclohexa-2,5-diene-1,4-dione** | 7.E+01 | 5.E+02 | 8.E+01 | 0 | 2.E+02 | 4.E+01 | 0 | 0 | 0 | 0 | 0 | 0 | 0 | 0 | 0 | 0 | 0 | Ketone |  |
| **3,3,5-Trimethylcyclohexyl methacrylate** | 3.E+04 | 8.E+03 | 7.E+03 | 0 | 0 | 0 | 0 | 0 | 0 | 0 | 0 | 0 | 0 | 0 | 0 | 0 | 0 | Ester |  |
| **3,4-Dimethyldihydrofuran-2,5-dione** | 0 | 0 | 0 | 0 | 0 | 0 | 0 | 3.E+02 | 0 | 0 | 6.E+00 | 0 | 7.E+01 | 0 | 4.E+02 | 0 | 1.E+02 | Ester |  |
| **3-[(2,4-dichlorophenyl)methoxy]-benzaldehyde** | 0 | 0 | 0 | 0 | 2.E+02 | 0 | 1.E+02 | 2.E+02 | 0 | 0 | 8.E+01 | 0 | 0 | 0 | 0 | 0 | 0 | DFG |  |
| **3-ethenyl-2-ethoxypyrazine** | 4.E+02 | 3.E+02 | 2.E+02 | 3.E+01 | 0 | 1.E+02 | 9.E+02 | 5.E+02 | 2.E+02 | 8.E+01 | 9.E+01 | 0 | 1.E+02 | 0 | 1.E+02 | 0 | 1.E+02 | DFG |  |
| **3-Methoxypropanenitrile** | 3.E+03 | 1.E+03 | 5.E+03 | 0 | 1.E+03 | 0 | 0 | 3.E+03 | 0 | 0 | 0 | 0 | 1.E+03 | 0 | 2.E+03 | 0 | 0 | DFG |  |
| **3-Methylfuran** | 5.E+02 | 2.E+02 | 0 | 0 | 8.E+01 | 0 | 2.E+01 | 2.E+00 | 0 | 0 | 0 | 0 | 0 | 0 | 3.E+02 | 0 | 0 | Ether |  |
| **3-Tetradecyne** | 0 | 4.E+02 | 8.E+02 | 0 | 5.E+01 | 7.E+02 | 0 | 0 | 2.E+02 | 0 | 0 | 0 | 0 | 0 | 7.E+01 | 0 | 3.E+02 | Alkyne |  |
| **4-(Phenylmethyl)benzeneethanamine** | 3.E+02 | 0 | 4.E+02 | 0 | 0 | 2.E+01 | 0 | 0 | 0 | 0 | 0 | 0 | 0 | 0 | 5.E+01 | 0 | 1.E+02 | Nitrogen containing compound |  |
| **4-Azidoheptane** | 0 | 0 | 0 | 0 | 0 | 0 | 5.E+02 | 6.E+02 | 0 | 0 | 0 | 2.E+02 | 2.E+02 | 0 | 1.E+01 | 0 | 0 | Nitrogen containing compound |  |
| **4-Ethylbenzoic acid, pentyl ester** | 4.E+02 | 4.E+02 | 5.E+02 | 0 | 0 | 0 | 2.E+03 | 1.E+03 | 0 | 0 | 0 | 0 | 0 | 0 | 0 | 0 | 0 | Ester |  |
| **5-Undecyne** | 8.E+02 | 4.E+02 | 3.E+02 | 0 | 0 | 6.E+02 | 2.E+02 | 0 | 4.E+02 | 0 | 0 | 0 | 0 | 0 | 4.E+02 | 0 | 6.E+02 | Alkyne |  |
| **6-Amino-1-hexanol, N,N-dimethyl-, methyl ether** | 0 | 0 | 0 | 0 | 0 | 0 | 6.E+01 | 4.E+02 | 1.E+03 | 0 | 0 | 0 | 0 | 0 | 1.E+02 | 0 | 0 | DFG |  |
| **6-Methyl-triazolo(2,3-b)(1,2,4)-triazine** | 3.E+02 | 4.E+02 | 2.E+02 | 0 | 0 | 1.E+02 | 9.E+02 | 1.E+03 | 8.E+02 | 2.E+02 | 3.E+02 | 0 | 0 | 0 | 0 | 0 | 0 | Nitrogen containing compound | * |
| **Acetaldehyde** | 0 | 0 | 0 | 1.E+03 | 0 | 0 | 9.E+02 | 4.E+03 | 2.E+03 | 0 | 2.E+03 | 7.E+02 | 0 | 0 | 0 | 0 | 2.E+03 | Aldehyde |  |
| **Acetone** | 8.E+03 | 8.E+03 | 4.E+03 | 0 | 0 | 0 | 1.E+04 | 1.E+04 | 1.E+03 | 3.E+02 | 2.E+03 | 0 | 0 | 0 | 3.E+03 | 0 | 0 | Aldehyde | * |
| **Benzaldehyde** | 2.E+03 | 2.E+03 | 1.E+03 | 0 | 0 | 0 | 0 | 2.E+03 | 0 | 0 | 0 | 0 | 0 | 0 | 4.E+02 | 0 | 0 | Aldehyde |  |
| **Benzene** | 1.E+03 | 1.E+03 | 5.E+02 | 0 | 0 | 0 | 9.E+02 | 1.E+03 | 0 | 0 | 0 | 0 | 0 | 0 | 0 | 0 | 0 | Aromatic compound |  |
| **Benzene, 1,3-bis(1-methylethyl)-** | 8.E+02 | 4.E+02 | 4.E+02 | 0 | 0 | 0 | 1.E+03 | 7.E+02 | 5.E+01 | 0 | 0 | 3.E+01 | 0 | 0 | 0 | 0 | 0 | Aromatic compound |  |
| **Benzeneacetaldehyde** | 1.E+03 | 1.E+03 | 6.E+02 | 0 | 0 | 0 | 7.E+02 | 3.E+03 | 0 | 0 | 0 | 0 | 0 | 0 | 0 | 0 | 0 | Aldehyde |  |
| **Benzeneacetic acid, a-amino-, methyl ester** | 0 | 2.E+02 | 2.E+02 | 8.E+01 | 0 | 4.E+00 | 2.E+02 | 0 | 1.E+02 | 0 | 0 | 0 | 1.E+02 | 0 | 2.E+02 | 0 | 0 | DFG |  |
| **Bicyclo[4.2.0]octa-1,3,5-triene-7,8-dione** | 6.E+00 | 3.E+02 | 6.E+01 | 0 | 0 | 0 | 1.E+02 | 2.E+02 | 0 | 0 | 0 | 0 | 0 | 0 | 0 | 0 | 0 | Aldehyde |  |
| **Bromochlorodifluoromethane** | 0 | 0 | 0 | 0 | 0 | 9.E+01 | 3.E+02 | 0 | 0 | 6.E+01 | 0 | 4.E+01 | 2.E+00 | 0 | 5.E+01 | 0 | 4.E+01 | Halogenated hydrocarbon |  |
| **Bromodichloromethane** | 6.E+02 | 8.E+02 | 7.E+02 | 0 | 0 | 0 | 8.E+02 | 3.E+03 | 2.E+02 | 0 | 2.E+02 | 0 | 0 | 0 | 0 | 0 | 0 | Halogenated hydrocarbon |  |

**Table S4 (cont.):**

| **Butanal** | 4.E+02 | 3.E+02 | 0 | 0 | 1.E+02 | 0 | 0 | 0 | 0 | 0 | 0 | 0 | 0 | 0 | 0 | 0 | 0 | Aldehyde |  |
| --- | --- | --- | --- | --- | --- | --- | --- | --- | --- | --- | --- | --- | --- | --- | --- | --- | --- | --- | --- |
| **Chlorobenzene-d5** | 1.E+02 | 2.E+03 | 2.E+03 | 0 | 0 | 0 | 2.E+03 | 3.E+03 | 8.E+01 | 0 | 0 | 0 | 0 | 0 | 0 | 0 | 0 | Halogenated hydrocarbon |  |
| **cis-Calamenene** | 1.E+03 | 9.E+02 | 8.E+02 | 2.E+02 | 0 | 0 | 8.E+02 | 1.E+03 | 2.E+02 | 0 | 0 | 0 | 0 | 0 | 0 | 0 | 1.E+02 | Aromatic compound |  |
| **Cyanamide, (dimethylphenylphosphoranylidene)-** | 0 | 0 | 7.E+02 | 0 | 0 | 0 | 5.E+02 | 8.E+02 | 0 | 2.E+02 | 2.E+02 | 1.E+02 | 0 | 0 | 0 | 0 | 0 | DFG |  |
| **Cyclohexanone** | 2.E+03 | 3.E+03 | 3.E+03 | 0 | 0 | 0 | 5.E+03 | 7.E+03 | 1.E+03 | 0 | 1.E+03 | 0 | 3.E+02 | 0 | 5.E+02 | 0 | 0 | Ketone |  |
| **Cyclopropa[3,4]pentaleno[1,2-d][1,3]dioxole, 2a,2b,2c,5a,5b,5c-hexahydro-, (2aa,2ba,2ca,5aa,5ba,5ca)-** | 8.E+02 | 4.E+02 | 7.E+02 | 4.E+01 | 0 | 2.E+02 | 1.E+02 | 0 | 9.E+01 | 0 | 0 | 0 | 0 | 0 | 3.E+01 | 0 | 4.E+02 | Ether |  |
| **Decanal** | 0 | 4.E+02 | 1.E+03 | 0 | 0 | 4.E+02 | 0 | 0 | 2.E+02 | 0 | 0 | 0 | 0 | 0 | 2.E+01 | 0 | 5.E+02 | Aldehyde |  |
| **Dibromochloromethane** | 2.E+03 | 7.E+02 | 8.E+02 | 0 | 0 | 0 | 6.E+02 | 4.E+03 | 3.E+02 | 0 | 2.E+02 | 0 | 0 | 0 | 0 | 0 | 0 | Halogenated hydrocarbon |  |
| **Dibromomethane** | 4.E+02 | 7.E+02 | 1.E+03 | 0 | 3.E+02 | 0 | 6.E+02 | 1.E+03 | 1.E+02 | 2.E+02 | 5.E+02 | 0 | 0 | 0 | 0 | 0 | 0 | Halogenated hydrocarbon | * |
| **Diethyl-, ethyl ester carbamodithioic acid** | 5.E+02 | 4.E+02 | 6.E+02 | 0 | 0 | 5.E+01 | 0 | 0 | 2.E+02 | 0 | 0 | 0 | 2.E+02 | 0 | 3.E+02 | 0 | 0 | DFG |  |
| **Dimethyl disulphide** | 0 | 2.E+02 | 3.E+02 | 0 | 2.E+03 | 0 | 0 | 4.E+02 | 0 | 0 | 0 | 0 | 0 | 0 | 2.E+02 | 0 | 0 | Sulphur containing compound |  |
| **Dimethyl-arsinic acid** | 5.E+02 | 2.E+02 | 2.E+02 | 0 | 3.E+01 | 2.E+02 | 0 | 6.E+02 | 4.E+01 | 0 | 0 | 3.E+00 | 3.E+01 | 0 | 1.E+02 | 0 | 0 | DFG |  |
| **Diphenylmethane** | 8.E+02 | 3.E+02 | 2.E+02 | 0 | 0 | 0 | 5.E+01 | 7.E+01 | 0 | 0 | 0 | 0 | 0 | 0 | 0 | 0 | 3.E+00 | Aromatic compound |  |
| **Di-tert-butyl peroxide** | 3.E+03 | 5.E+02 | 5.E+02 | 0 | 4.E+02 | 0 | 3.E+03 | 3.E+03 | 2.E+02 | 3.E+01 | 3.E+02 | 0 | 0 | 0 | 0 | 0 | 0 | Ether | * |
| **Heptane, 2,5,5-trimethyl** | 5.E+02 | 5.E+02 | 3.E+02 | 0 | 0 | 0 | 2.E+03 | 1.E+03 | 0 | 0 | 4.E+01 | 0 | 0 | 0 | 3.E+02 | 0 | 0 | Alkane |  |
| **Hexadecane** | 0 | 4.E+03 | 0 | 0 | 0 | 0 | 0 | 0 | 0 | 0 | 0 | 0 | 0 | 2.E+04 | 0 | 2.E+03 | 4.E+03 | Alkane | * |
| **Hexanal** | 3.E+02 | 3.E+02 | 4.E+02 | 0 | 0 | 0 | 3.E+02 | 0 | 0 | 0 | 0 | 0 | 0 | 0 | 8.E+01 | 0 | 0 | Aldehyde |  |
| **Histamine, N-acetyl-5-bromo-** | 1.E+02 | 2.E+01 | 9.E+01 | 0 | 0 | 0 | 0 | 1.E+02 | 0 | 0 | 0 | 0 | 0 | 0 | 1.E+01 | 0 | 0 | DFG |  |
| **Homosalate** | 3.E+02 | 2.E+02 | 6.E+01 | 0 | 0 | 0 | 9.E+01 | 2.E+02 | 3.E+02 | 0 | 1.E+01 | 0 | 0 | 0 | 3.E+02 | 0 | 2.E+01 | DFG |  |
| **Isocyanatomethane** | 0 | 2.E+03 | 0 | 1.E+03 | 0 | 0 | 3.E+03 | 0 | 8.E+02 | 3.E+02 | 4.E+02 | 7.E+02 | 3.E+02 | 0 | 6.E+02 | 0 | 4.E+02 | DFG |  |
| **Isolongifoline** | 5.E+03 | 0 | 0 | 0 | 0 | 3.E+03 | 1.E+04 | 1.E+03 | 3.E+03 | 1.E+03 | 0 | 4.E+02 | 8.E+03 | 0 | 1.E+03 | 0 | 8.E+02 | Alkene |  |
| **Methyl N-hydroxybenzenecarboximidoate** | 6.E+03 | 6.E+02 | 2.E+04 | 0 | 0 | 0 | 0 | 3.E+04 | 0 | 0 | 0 | 0 | 0 | 0 | 0 | 0 | 0 | DFG |  |
| **Methylal** | 1.E+03 | 2.E+03 | 2.E+03 | 4.E+02 | 6.E+01 | 7.E+01 | 6.E+02 | 3.E+03 | 2.E+02 | 0 | 0 | 0 | 0 | 0 | 0 | 0 | 0 | Ether |  |
| **Methylene chloride** | 0 | 2.E+02 | 2.E+02 | 1.E+02 | 0 | 4.E+01 | 0 | 4.E+02 | 0 | 0 | 6.E+00 | 6.E+01 | 0 | 0 | 5.E+01 | 0 | 0 | Halogenated hydrocarbon |  |
| **Monoacetate tetraethylene glycol** | 4.E+01 | 2.E+02 | 2.E+02 | 0 | 0 | 0 | 0 | 3.E+02 | 0 | 0 | 0 | 0 | 0 | 0 | 0 | 0 | 0 | DFG |  |
| **N-(4-methoxybenzyl)-thiazol-2-amine** | 1.E+02 | 1.E+02 | 2.E+02 | 0 | 0 | 0 | 6.E+01 | 4.E+02 | 1.E+02 | 0 | 0 | 0 | 0 | 0 | 0 | 0 | 0 | DFG |  |
| **Naphtho[2,1-b]furan** | 2.E+02 | 3.E+02 | 7.E+01 | 0 | 0 | 0 | 0 | 0 | 0 | 0 | 0 | 0 | 0 | 0 | 0 | 0 | 1.E+02 | Ether |  |
| **Napthalene** | 1.E+04 | 8.E+03 | 9.E+03 | 0 | 0 | 0 | 8.E+03 | 3.E+04 | 7.E+03 | 0 | 2.E+02 | 0 | 0 | 0 | 0 | 0 | 0 | Aromatic compound | * |
| **Neopentyl ester butyric acid** | 4.E+02 | 4.E+02 | 0 | 0 | 3.E+01 | 0 | 2.E+03 | 2.E+03 | 0 | 2.E+02 | 0 | 3.E+02 | 0 | 0 | 0 | 0 | 0 | Ester |  |
| **n-Hexane** | 4.E+02 | 2.E+02 | 0 | 0 | 5.E+01 | 0 | 0 | 2.E+02 | 0 | 0 | 0 | 6.E+01 | 0 | 0 | 0 | 0 | 0 | Alkane |  |
| **N-Methylisatoic anhydride** | 7.E+02 | 5.E+02 | 1.E+03 | 0 | 0 | 0 | 0 | 0 | 2.E+02 | 0 | 0 | 0 | 0 | 0 | 4.E+02 | 0 | 0 | DFG |  |
| **Nonanal** | 2.E+03 | 3.E+03 | 2.E+03 | 0 | 0 | 0 | 3.E+03 | 5.E+02 | 2.E+02 | 0 | 0 | 0 | 0 | 0 | 7.E+02 | 0 | 0 | Aldehyde |  |
| **Octanal** | 8.E+01 | 7.E+02 | 1.E+03 | 0 | 0 | 0 | 2.E+03 | 5.E+02 | 0 | 0 | 0 | 0 | 0 | 0 | 1.E+02 | 0 | 0 | Aldehyde |  |
| **o-Cymene_a** | 2.E+03 | 2.E+03 | 1.E+02 | 0 | 0 | 0 | 9.E+02 | 5.E+03 | 4.E+02 | 0 | 0 | 0 | 0 | 0 | 0 | 0 | 0 | Aromatic compound |  |
| **o-Cymene_c** | 1.E+03 | 5.E+02 | 9.E+02 | 0 | 0 | 0 | 4.E+02 | 2.E+03 | 0 | 0 | 0 | 0 | 0 | 0 | 0 | 0 | 0 | Aromatic compound |  |
| **o-Cymene_d** | 8.E+02 | 4.E+02 | 1.E+02 | 0 | 0 | 0 | 2.E+02 | 2.E+03 | 0 | 0 | 0 | 0 | 0 | 0 | 0 | 0 | 0 | Aromatic compound |  |
| **p-Xylene** | 2.E+03 | 2.E+03 | 2.E+03 | 0 | 0 | 0 | 3.E+03 | 6.E+03 | 2.E+01 | 0 | 0 | 0 | 0 | 0 | 0 | 0 | 0 | Aromatic compound |  |
| **Pyrrolo(2,3-b)pyrazine** | 1.E+03 | 5.E+02 | 6.E+02 | 2.E+01 | 0 | 6.E+02 | 0 | 0 | 0 | 0 | 0 | 0 | 0 | 0 | 1.E+02 | 0 | 1.E+03 | Nitrogen containing compound |  |
| **s-Triazole, 3-chloro-** | 0 | 0 | 0 | 0 | 0 | 3.E+02 | 5.E+02 | 7.E+02 | 0 | 1.E+02 | 1.E+02 | 0 | 0 | 0 | 0 | 0 | 4.E+02 | DFG |  |
| **Styrene** | 2.E+03 | 2.E+03 | 1.E+03 | 0 | 0 | 0 | 2.E+03 | 4.E+03 | 2.E+02 | 0 | 4.E+02 | 4.E+02 | 9.E+01 | 0 | 1.E+02 | 0 | 0 | Aromatic compound |  |
| **Tetrachloroethylene** | 7.E+01 | 8.E+01 | 0 | 0 | 0 | 0 | 5.E+01 | 7.E+01 | 0 | 0 | 2.E+00 | 4.E+01 | 3.E+01 | 0 | 2.E+01 | 0 | 0 | Halogenated hydrocarbon |  |

**Table S4 (cont.):**

| **Tetradecafluorohexane** | 2.E+02 | 3.E+02 | 2.E+02 | 3.E+01 | 0 | 0 | 0 | 0 | 0 | 0 | 0 | 0 | 0 | 0 | 0 | 0 | 0 | Halogenated hydrocarbon |  |
| --- | --- | --- | --- | --- | --- | --- | --- | --- | --- | --- | --- | --- | --- | --- | --- | --- | --- | --- | --- |
| **Tetradecane** | 3.E+02 | 1.E+03 | 2.E+03 | 0 | 0 | 4.E+03 | 60216.14 | 0 | 0 | 0 | 0 | 0 | 0 | 0 | 1.E+03 | 2.E+02 | 1.E+03 | Alkane |  |
| **Tetradecanoic acid, 10,13-dimethyl-, methyl ester** | 3.E+02 | 1.E+02 | 3.E+02 | 0 | 0 | 2.E+02 | 0 | 0 | 0 | 0 | 0 | 0 | 0 | 0 | 0 | 0 | 4.E+02 | Ester |  |
| **Tolazoline acetate** | 2.E+02 | 2.E+02 | 2.E+02 | 3.E+00 | 0 | 0 | 1.E+02 | 2.E+02 | 7.E+01 | 3.E+01 | 2.E+01 | 5.E+01 | 4.E+01 | 0 | 0 | 0 | 0 | DFG |  |
| **Toluene** | 8.E+03 | 8.E+03 | 9.E+03 | 0 | 0 | 0 | 1.E+04 | 1.E+04 | 2.E+02 | 0 | 0 | 0 | 0 | 0 | 0 | 0 | 0 | Aromatic compound |  |
| **Tribromomethane** | 3.E+03 | 2.E+03 | 7.E+02 | 0 | 0 | 0 | 2.E+03 | 9.E+03 | 6.E+02 | 0 | 0 | 0 | 0 | 0 | 0 | 0 | 0 | Halogenated hydrocarbon |  |
| **Trichloromethane** | 9.E+02 | 1.E+03 | 1.E+03 | 0 | 0 | 0 | 1.E+03 | 4.E+03 | 4.E+02 | 0 | 0 | 0 | 0 | 0 | 0 | 0 | 0 | Halogenated hydrocarbon |  |
| **Tridecane** | 0 | 1.E+03 | 0 | 0 | 0 | 2.E+03 | 1.E+03 | 0 | 4.E+02 | 0 | 4.E+02 | 0 | 0 | 0 | 0 | 0 | 0 | Alkane |  |
| **UC_11.64** | 5.E+01 | 7.E+01 | 7.E+01 | 0 | 0 | 0 | 0 | 0 | 0 | 0 | 0 | 0 | 0 | 0 | 0 | 0 | 0 | Unclassified |  |
| **UC_11.82** | 2.E+02 | 4.E+02 | 3.E+02 | 0 | 0 | 0 | 0 | 9.E+01 | 0 | 0 | 0 | 4.E+01 | 6.E+01 | 0 | 0 | 0 | 0 | Unclassified |  |
| **UC_17.19** | 9.E+01 | 1.E+02 | 1.E+02 | 0 | 2.E+01 | 0 | 0 | 0 | 0 | 0 | 0 | 0 | 0 | 0 | 0 | 0 | 0 | Unclassified |  |
| **UC_40.63** | 6.E+03 | 4.E+03 | 3.E+03 | 0 | 0 | 0 | 0 | 0 | 0 | 0 | 0 | 1.E+02 | 0 | 0 | 1.E+02 | 0 | 0 | Unclassified |  |
| **UC_42.05** | 2.E+03 | 7.E+02 | 4.E+02 | 0 | 0 | 0 | 4.E+03 | 3.E+03 | 7.E+02 | 3.E+02 | 4.E+02 | 5.E+02 | 0 | 0 | 0 | 0 | 1.E+01 | Unclassified |  |
| **UC_42.51** | 0 | 0 | 0 | 0 | 0 | 0 | 9.E+01 | 2.E+02 | 0 | 3.E+01 | 0 | 0 | 8.E+01 | 0 | 6.E+01 | 0 | 0 | Unclassified |  |
| **UC_42.58** | 5.E+02 | 4.E+02 | 0 | 0 | 0 | 0 | 6.E+02 | 4.E+02 | 9.E+01 | 0 | 0 | 0 | 7.E+01 | 0 | 8.E+01 | 0 | 0 | Unclassified |  |
| **UC_43.08** | 8.E+02 | 9.E+02 | 1.E+03 | 2.E+02 | 0 | 4.E+01 | 0 | 2.E+02 | 2.E+02 | 0 | 0 | 2.E+02 | 3.E+02 | 0 | 4.E+02 | 0 | 4.E+01 | Unclassified |  |
| **UC_43.20** | 4.E+02 | 5.E+02 | 2.E+02 | 0 | 0 | 0 | 0 | 0 | 0 | 0 | 0 | 0 | 0 | 0 | 2.E+02 | 0 | 0 | Unclassified |  |
| **UC_43.63** | 3.E+02 | 3.E+02 | 8.E+02 | 2.E+02 | 4.E+01 | 0 | 0 | 0 | 1.E+02 | 0 | 0 | 0 | 0 | 0 | 0 | 0 | 0 | Unclassified |  |
| **UC_43.76** | 4.E+00 | 0 | 7.E+01 | 0 | 0 | 0 | 0 | 0 | 0 | 0 | 0 | 1.E+01 | 4.E-01 | 0 | 2.E+01 | 0 | 0 | Unclassified |  |
| **UC_43.82** | 2.E+02 | 1.E+02 | 5.E+02 | 0 | 0 | 8.E+01 | 0 | 0 | 4.E+00 | 0 | 0 | 0 | 0 | 0 | 7.E+01 | 0 | 1.E+02 | Unclassified |  |
| **UC_44.09** | 2.E+00 | 3.E+01 | 0 | 0 | 0 | 0 | 5.E+02 | 5.E+02 | 2.E+02 | 0 | 0 | 0 | 0 | 0 | 0 | 0 | 0 | Unclassified |  |
| **UC_44.34** | 3.E+02 | 0 | 0 | 4.E+00 | 0 | 2.E+02 | 0 | 2.E+02 | 2.E+02 | 0 | 0 | 0 | 1.E+02 | 0 | 4.E+02 | 0 | 0 | Unclassified |  |
| **UC_44.56** | 3.E+02 | 0 | 2.E+02 | 0 | 0 | 2.E+02 | 4.E+02 | 6.E+02 | 3.E+02 | 2.E+02 | 1.E+02 | 0 | 0 | 0 | 6.E+01 | 0 | 0 | Unclassified |  |
| **UC_45.57** | 1.E+03 | 0 | 6.E+01 | 0 | 0 | 5.E+01 | 6.E+02 | 5.E+02 | 3.E+02 | 0 | 1.E+02 | 0 | 0 | 0 | 0 | 0 | 3.E+02 | Unclassified |  |
| **UC_45.72** | 5.E+02 | 5.E+02 | 0 | 0 | 5.E+01 | 0 | 4.E+02 | 1.E+02 | 4.E+01 | 0 | 0 | 1.E+02 | 3.E+01 | 0 | 2.E+02 | 0 | 0 | Unclassified |  |
| **UC_45.88** | 0 | 2.E+02 | 0 | 3.E+01 | 0 | 0 | 1.E+02 | 3.E+02 | 6.E+01 | 0 | 0 | 0 | 2.E+01 | 0 | 3.E+01 | 0 | 1.E+02 | Unclassified |  |
| **UC_45.93** | 3.E+02 | 3.E+02 | 4.E+02 | 0 | 4.E+01 | 2.E+02 | 0 | 2.E+02 | 2.E+02 | 0 | 0 | 0 | 0 | 0 | 3.E+02 | 0 | 0 | Unclassified |  |
| **UC_46.33** | 2.E+03 | 2.E+03 | 1.E+03 | 0 | 8.E+01 | 0 | 4.E+03 | 0 | 1.E+03 | 0 | 0 | 2.E+02 | 0 | 0 | 0 | 0 | 0 | Unclassified |  |
| **UC_46.80** | 0 | 0 | 0 | 0 | 1.E+02 | 0 | 0 | 0 | 0 | 0 | 0 | 0 | 0 | 7.E+01 | 2.E+02 | 0 | 2.E+02 | Unclassified |  |
| **UC_9.22** | 6.E+03 | 6.E+03 | 5.E+03 | 0 | 0 | 0 | 0 | 0 | 0 | 0 | 0 | 0 | 0 | 0 | 1.E+03 | 0 | 0 | Unclassified |  |

**References cited:**

Harianto J, Carey N, Byrne M (2017). respR—An R package for the manipulation and analysis of respirometry data. Met. in Ecol. Evol. doi: 10.1111/2041-210X.13162.
